1 **Validation of new bioinformatic tools to identify expanded repeats: a non-reference**  
2 **intronic pentamer expansion in *RFC1* causes CANVAS**

3  
4 Haloom Rafehi<sup>1,2,33</sup>, David J Szmulewicz<sup>3,4,33</sup>, Mark F Bennett<sup>1,2,5</sup>, Nara LM Sobreira<sup>6</sup>, Kate  
5 Pope<sup>7</sup>, Katherine R Smith<sup>1</sup>, Greta Gillies<sup>7</sup>, Peter Diakumis<sup>8</sup>, Egor Dolzhenko<sup>9</sup>, Michael A  
6 Eberle<sup>9</sup>, María García Barcina<sup>10</sup>, David P Breen<sup>11,12,13</sup>, Andrew M Chancellor<sup>14</sup>, Phillip D  
7 Cremer<sup>15,16</sup>, Martin B. Delatycki<sup>7,17</sup>, Brent L Fogel<sup>18</sup>, Anna Hackett<sup>19,20</sup>, G. Michael  
8 Halmagyi<sup>21,22</sup>, Solange Kapetanovic<sup>23</sup>, Anthony Lang<sup>24,25</sup>, Stuart Mossman<sup>26</sup>, Weiyi Mu<sup>6</sup>,  
9 Peter Patrikios<sup>27</sup>, Susan L Perlman<sup>28</sup>, Ian Rosemargy<sup>29</sup>, Elsdon Storey<sup>30</sup>, Shaun RD Watson<sup>31</sup>,  
10 Michael A Wilson<sup>7</sup>, David Zee<sup>32</sup>, David Valle<sup>6</sup>, David J Amor<sup>7,17</sup>, Melanie Bahlo<sup>1,2,34</sup> and  
11 Paul J Lockhart<sup>7,17,34\*</sup>

12  
13 <sup>1</sup> Population Health and Immunity Division, The Walter and Eliza Hall Institute of Medical  
14 Research, 1G Royal Parade, Parkville, Victoria 3052, Australia

15 <sup>2</sup> Department of Medical Biology, University of Melbourne, 1G Royal Parade, Parkville,  
16 Victoria 3052, Australia

17 <sup>3</sup> Cerebellar Ataxia Clinic, Neuroscience Department, Alfred Health, Melbourne, Victoria  
18 3004, Australia

19 <sup>4</sup> Balance Disorders and Ataxia Service, Royal Victorian Eye & Ear Hospital, East  
20 Melbourne, Victoria 3002, Australia.

21 <sup>5</sup> Epilepsy Research Centre, Department of Medicine, University of Melbourne, Austin  
22 Health, 245 Burgundy Street, Heidelberg, Victoria 3084, Australia

23 <sup>6</sup> McKusick-Nathans Institute of Genetic Medicine, Johns Hopkins University School of  
24 Medicine, Baltimore, MD, 21205, USA

25 <sup>7</sup> Bruce Lefroy Centre, Murdoch Children's Research Institute, Flemington Rd, Parkville,  
26 Victoria 3052, Australia

27 <sup>8</sup> University of Melbourne Centre for Cancer Research, Victorian Comprehensive Cancer  
28 Centre, 305 Grattan Street, Melbourne, Victoria 3000, Australia

29 <sup>9</sup> Illumina Inc, 5200 Illumina Way, San Diego, CA 92122, USA

30 <sup>10</sup> Genetic Unit, Basurto University Hospital, OSI Bilbao-Basurto, avenida Montevideo 18  
31 (48013 Bilbao), Spain

32 <sup>11</sup> Centre for Clinical Brain Sciences, University of Edinburgh, Edinburgh, EH16 4SB,  
33 Scotland

- 34 <sup>12</sup> Anne Rowling Regenerative Neurology Clinic, University of Edinburgh, Edinburgh, EH16  
35 4SB, Scotland
- 36 <sup>13</sup> Centre for Medical Informatics, Usher Institute of Population Health Sciences and  
37 Informatics, University of Edinburgh, Edinburgh, EH16 4UX, Scotland
- 38 <sup>14</sup> Department of Neurology, Tauranga Hospital, Private Bag, Cameron Road, Tauranga  
39 3171, New Zealand
- 40 <sup>15</sup> University of Sydney, New South Wales 2006, Australia
- 41 <sup>16</sup> Royal North Shore Hospital, Pacific Hwy, St Leonards, New South Wales 2065, Australia
- 42 <sup>17</sup> Department of Paediatrics, University of Melbourne, Royal Children's Hospital,  
43 Flemington Rd, Parkville, Victoria 3052, Australia
- 44 <sup>18</sup> Departments of Neurology and Human Genetics, David Geffen School of Medicine  
45 University of California, Los Angeles, CA 90095, USA
- 46 <sup>19</sup> Hunter Genetics, Hunter New England Health Service, Waratah, Newcastle, New South  
47 Wales 2300, Australia
- 48 <sup>20</sup> University of Newcastle, Newcastle, New South Wales 2300, Australia
- 49 <sup>21</sup> Neurology Department, Royal Prince Alfred Hospital, Camperdown New South Wales,  
50 2050, Australia
- 51 <sup>22</sup> Central Clinical School, University of Sydney, Camperdown, New South Wales 2050,  
52 Australia
- 53 <sup>23</sup> Servicio de Neurología, Hospital de Basurto, Avenida de Montevideo 18, 48013, Bilbao,  
54 Bizkaia , Spain
- 55 <sup>24</sup> Edmond J. Safra Program in Parkinson's disease and the Morton and Gloria Shulman  
56 Movement Disorders Clinic, Toronto Western Hospital, Toronto, ON M5T 2S8, Canada
- 57 <sup>25</sup> Department of Medicine, Division of Neurology, University Health Network and the  
58 University of Toronto, Toronto, ON M5S, Canada
- 59 <sup>26</sup> Department of Neurology, Wellington Hospital, Wellington 6021, New Zealand
- 60 <sup>27</sup> Sunshine Neurology, Maroochydore, Queensland 4558, Australia
- 61 <sup>28</sup> Department of Neurology, David Geffen School of Medicine, University of California, Los  
62 Angeles, CA 90095, USA
- 63 <sup>29</sup> Riddiford Medical, Newtown, Wellington 6023, New Zealand
- 64 <sup>30</sup> Department of Neuroscience, Central Clinical School, Monash University, Alfred Hospital  
65 Campus, Commercial Road, Melbourne, Victoria 3004, Australia
- 66 <sup>31</sup> Institute of Neurological Sciences, Prince of Wales Hospital, Randwick, New South Wales  
67 2031, Australia

68 <sup>32</sup> Department of Neurology, Johns Hopkins Hospital, Baltimore, MD 21287 USA

69

70 <sup>33</sup> These authors contributed equally to this work

71 <sup>34</sup> These authors contributed equally to this work

72

73 \* Correspondence to Dr Paul Lockhart, Murdoch Children's Research Institute, Flemington  
74 Rd, Parkville, Victoria 3052, Australia; [paul.lockhart@mcri.edu.au](mailto:paul.lockhart@mcri.edu.au)

75

76 Running title: An intronic repeat expansion in RFC1 causes CANVAS

77

78 Keywords: CANVAS, ataxia, repeat expansions, short tandem repeats, whole genome  
79 sequencing.

80 **ABSTRACT**

81 Genomic technologies such as Next Generation Sequencing (NGS) are revolutionizing  
82 molecular diagnostics and clinical medicine. However, these approaches have proven  
83 inefficient at identifying pathogenic repeat expansions. Here, we apply a collection of  
84 bioinformatics tools that can be utilized to identify either known or novel expanded repeat  
85 sequences in NGS data. We performed genetic studies of a cohort of 35 individuals from 22  
86 families with a clinical diagnosis of cerebellar ataxia with neuropathy and bilateral vestibular  
87 areflexia syndrome (CANVAS). Analysis of whole genome sequence (WGS) data with five  
88 independent algorithms identified a recessively inherited intronic repeat expansion  
89 [(AAGGG)<sub>exp</sub>] in the gene encoding Replication Factor C1 (*RFC1*). This motif, not reported  
90 in the reference sequence, localized to an Alu element and replaced the reference (AAAAG)<sub>11</sub>  
91 short tandem repeat. Genetic analyses confirmed the pathogenic expansion in 18 of 22  
92 CANVAS families and identified a core ancestral haplotype, estimated to have arisen in  
93 Europe over twenty-five thousand years ago. WGS of the four *RFC1* negative CANVAS  
94 families identified plausible variants in three, with genomic re-diagnosis of SCA3, spastic  
95 ataxia of the Charlevoix-Saguenay type and SCA45. This study identified the genetic basis of  
96 CANVAS and demonstrated that these improved bioinformatics tools increase the diagnostic  
97 utility of WGS to determine the genetic basis of a heterogeneous group of clinically  
98 overlapping neurogenetic disorders.

99

## 100 INTRODUCTION

101 Repetitive DNA sequences constitute approximately one third of the genome and are  
102 thought to contribute to diversity within and between species.<sup>1</sup> Microsatellites or short  
103 tandem repeats (STRs) are mini-repeats of DNA, typically two to five base-pairs in length,  
104 which are usually present in a concatamer of between five and fifty repeated elements. There  
105 are thousands of STRs scattered through the human genome and recent studies have  
106 suggested important roles for STRs in the regulation of gene expression.<sup>2;3</sup> STRs display  
107 considerable variability in length between individuals, which is presumed to have no  
108 detrimental consequences for humans<sup>4;5</sup> unless the repeat number is expanded beyond a  
109 gene-specific threshold.<sup>6;7</sup> Pathogenic repeat expansions (REs) have been shown to underlie  
110 at least 30 inherited human diseases, the majority being disorders of the nervous system.<sup>8</sup>  
111 These disorders, which variably have autosomal dominant, autosomal recessive and X-linked  
112 inheritance, have an overall prevalence of ~1:20,000.<sup>9</sup> They display a broad onset age and are  
113 characterized by progressive cerebellar ataxia with dysarthria, oculomotor abnormalities,  
114 cognitive dysfunction and other symptoms.<sup>10</sup> Additional novel pathogenic REs likely remain  
115 to be identified. For example, putative spinocerebellar ataxia (SCA) loci, including SCA25  
116 (MIM: 608703) and SCA30 (MIM: 613371) remain to be identified, and unsolved hereditary  
117 ataxias such as cerebellar ataxia with neuropathy and bilateral vestibular areflexia syndrome  
118 (CANVAS, MIM: 614575) display extensive clinical similarities with known RE disorders.

119

120 CANVAS is a cerebellar ataxia with combined cerebellar, vestibular and  
121 somatosensory dysfunction.<sup>11;12</sup> Historically, individuals with CANVAS have been assigned  
122 the diagnosis of idiopathic late onset cerebellar ataxia.<sup>13</sup> More recently, CANVAS is  
123 clinically recognized and has been incorporated into the contemporary research and teaching  
124 of both cerebellar and vestibular diseases.<sup>14;15</sup> Unifying the oto- and neuropathology,  
125 CANVAS is a neuronopathy (ganglionopathy) affecting the vestibular<sup>16</sup> and dorsal root  
126 ganglia.<sup>17</sup> The progression of these clinical features can be measured longitudinally using a  
127 specific neurophysiological protocol.<sup>18</sup> A characteristic radiological pattern of cerebellar  
128 atrophy has also been described and verified on post-mortem pathology.<sup>11</sup> The characteristic  
129 oculomotor abnormality seen in combined cerebellar and vestibular impairment is the  
130 visually-enhanced vestibulo-ocular reflex (VVOR), and this can now be evaluated using a  
131 commercially available instrumented assessment tool.<sup>19-21</sup> Altogether, these advances have  
132 allowed the formulation of diagnostic criteria to aid identification of CANVAS, contributing  
133 both research and clinical benefits including improved prognostication and targeted

134 management.<sup>12, 14</sup> While detailed clinical findings have driven gene discovery in RE disorders  
135 such as Friedreich ataxia<sup>22</sup> the underlying genetic cause(s) of CANVAS has, until very  
136 recently, remained elusive (see below).

137 The majority of individuals and families with CANVAS have been identified in  
138 individuals of European ancestry, although CANVAS has recently been reported in two  
139 individuals of Japanese ethnicity, a 68-year old male<sup>23</sup> and a 76 year old female.<sup>24</sup> A genetic  
140 cause of CANVAS is highly plausible given the observation of 13 affected siblings and  
141 families with multiple affected individuals over several generations.<sup>12</sup> The pattern of  
142 inheritance suggests an autosomal recessive trait, although autosomal dominant inheritance  
143 with incomplete penetrance cannot be excluded. CANVAS symptoms overlap considerably  
144 with SCA3 (also known as Machado-Joseph disease, MIM: 109150) and Friedreich ataxia  
145 (MIM: 229300), both genetic forms of ataxia caused by the inheritance of a pathogenic RE.  
146 These observations are consistent with the hypothesis that a novel pathogenic STR expansion  
147 may underlie CANVAS.

148

149 Historically, the detection of REs has been time-consuming and expensive. Indeed, it  
150 is only in recent years that computational methods have been developed to screen for RE in  
151 short-read whole exome sequence (WES) and WGS data<sup>25</sup>, leading to the discovery of novel,  
152 disease causing REs. For example, a pentanucleotide RE was identified to underlie autosomal  
153 dominant spinocerebellar ataxia 37 (SCA37; OMIM: 615945).<sup>26</sup> Moreover, pathogenic REs  
154 of intronic pentamers (TTTCA)<sub>n</sub> and (TTTTA)<sub>n</sub> were identified as the cause of Benign Adult  
155 Familial Myoclonus Epilepsy locus 1, 6 and 7 (BAFME1, OMIM: 618073; BAFME6,  
156 OMIM: 618074; BAFME1, OMIM: 618075).<sup>27</sup>

157

158 A number of bioinformatics tools now exist that allow screening of short-read  
159 sequencing data for expanded STRs.<sup>25</sup> Initially, STR detection tools, such as lobSTR and  
160 hipSTR, were limited to short STRs that were encompassed by a single sequencing read.  
161 However, in the last two years, multiple methods have been released that can screen WES  
162 and WGS datasets for REs without being limited by read length. These include  
163 ExpansionHunter (EH)<sup>28</sup>, exSTRA<sup>8</sup>, TREDPARSE<sup>29</sup>, STRetch<sup>30</sup> and GangSTR.<sup>31</sup> These are  
164 all reference based methods - i.e. they rely on a catalogue of STR loci and motifs and are  
165 therefore limited to detecting expansion of previously defined STRs, such as those catalogued  
166 in the UCSC track. Moreover, the normal variability in STR length and repeat composition  
167 remains poorly described, particularly for rare STRs or those larger than ~100bp. Therefore,

168 there is a need for bioinformatics tools that are unbiased to the limited catalogues of STR loci  
169 available. Ideally, these tools will be able to search genome-wide for expanded repeat  
170 sequences in NGS data, independent of prior knowledge of either the location or composition  
171 of the RE. Here, we utilized a STR reference-free method called Expansion Hunter De Novo  
172 (EHdn), in combination with multiple reference-based tools, to show that CANVAS is caused  
173 by the homozygous inheritance of a novel and expanded intronic pentamer [(AAGGG)<sub>exp</sub>] in  
174 the gene encoding Replication Factor C Subunit 1 (*RFC1*). An independent study, published  
175 while this work was under review, similarly identified the causal pentamer in *RFC1*. Cortese  
176 and colleagues defined a small linkage region from ten families with CANVAS and the  
177 causative RE was identified by WGS and visual inspection of the aligned read pairs inside the  
178 linkage region.<sup>32</sup>

## 179 **MATERIALS AND METHODS**

### 180 **Recruitment, linkage and next generation sequence data**

181 The Royal Children's Hospital Human Research Ethics Committee approved the  
182 study (HREC 28097). Informed consent was obtained from all participants and clinical  
183 details were collected from clinical assessments and review of medical records. Genomic  
184 DNA was isolated from peripheral blood. Single nucleotide polymorphism (SNP) genotype  
185 data were generated for two affected siblings from three families (CANVAS1, 2, 3) and all  
186 six siblings from family CANVAS4 using the Illumina Infinium HumanOmniExpress  
187 BeadChip genotyping array. SNP genotypes for individuals from CANVAS9 were extracted  
188 from WES data.<sup>33</sup> Parametric multipoint linkage analysis was subsequently performed using  
189 LINKDATAGEN and MERLIN<sup>34;35</sup> specifying a rare recessive disease model with complete  
190 penetrance, and overlapping linkage signals were detected using BEDtools.<sup>36</sup> WES was  
191 performed on individuals from CANVAS9 using Agilent SureSelect XT Human All exon V5  
192 + UTR on the Illumina HiSeq2000 platform at 50x mean coverage. WES was performed on  
193 an additional 23 individuals from 15 families in collaboration with the Johns Hopkins Center  
194 for Inherited Disease Research (CIDR) as part of the Baylor-Hopkins Center for Mendelian  
195 Genomics (BHCMG). WGS was performed in two stages. Libraries for the first round of  
196 samples, including two affected individuals from CANVAS1 and CANVAS9 and 31  
197 individuals lacking a clinical diagnosis of CANVAS (subsequently referred to as controls  
198 although some have a diagnosis other than CANVAS), were prepared using the TruSeq nano  
199 PCR-based Library Preparation Kit and sequenced on the Illumina HiSeq X platform.  
200 Libraries for the second round of WGS, including affected individuals with evidence of an  
201 alternate RE motif (CANVAS2 and CANVAS8) or lacking the pathogenic RE in *RFC1*  
202 (CANVAS11,13, 17 and 19), were prepared using the TruSeq PCR-free DNA HT Library  
203 Preparation Kit and sequenced on the Illumina NovaSeq 6000 platform. PCR-free WGS data  
204 from 69 unrelated Coriell controls<sup>28</sup> was obtained from Illumina. GTEx samples (SRA files,  
205 133 WGS with matching cerebellar RNA-seq) were downloaded from the dbGAP  
206 (phs000424.v7.p2).

207

### 208 **Alignment and variant calling**

209 Alignment and haplotype calling were performed based on the GATK best practice  
210 pipeline. All WES and WGS datasets were aligned to the hg19 reference genome using  
211 BWA-mem, then duplicate marking, local realignment and recalibration were performed with  
212 GATK. Merged VCF files were annotated using vcfanno<sup>37</sup> and ANNOVAR.<sup>38</sup> Candidate



213 variant filtering was performed using CAVALIER, an R package for variant interpretation in  
214 NGS data (<https://github.com/bahlolab/cavalier>). Standard variant calling was performed on  
215 WGS data for CANVAS samples negative for the pathogenic RE in *RFC1*. Candidate  
216 variants were defined as i) occurring in known ataxia genes, as defined by OMIM, ii) exonic,  
217 with a minor allele frequency of less than 0.0001 in gnomAD (both genome and exome data)  
218 and iii) predicted pathogenic by both SIFT and PolyPhen2. RNA-seq data was aligned to the  
219 hg19 reference genome (ENSEMBL Homo\_sapiens.GRCh37.75) using STAR.<sup>39</sup> Reads were  
220 summarized by gene ID into a counts matrix using featureCounts<sup>40</sup> (quality score  $\geq 10$ ) and  
221 converted to log10 of the counts per million using limma.<sup>41</sup>

222

### 223 **STR analysis**

224 Genome-wide screening for putative REs was performed using Expansion Hunter  
225 Denovo (EHdn) version 0.6.2, an open-source method that is being developed by Illumina,  
226 Inc, the Walter Eliza Hall Institute and others. EHdn operates by performing a genome-wide  
227 search for read pairs where one mate has confident alignment (anchor) and the second mate  
228 consists of repetition of a repeat motif (in-repeat read). The program reports the counts of in-  
229 repeat reads with anchor mates stratified by the repeat motif and genomic position of their  
230 anchor mate. For this analysis we defined a confidently-aligned read as one aligned with  
231 MAPQ of 50 or above. The counts of in-repeat reads with anchor mates were subsequently  
232 compared for each region in cases (CANVAS) and controls using a permutation test ( $10^6$   
233 permutations). The resulting p-values were used to rank candidate sites with higher counts in  
234 individuals with CANVAS than in the controls for further computational validation. These  
235 candidates were subsequently annotated with ANNOVAR.

236

237 Computational validation was performed using five independent STR detection tools  
238 for short-read NGS after updating the STR catalogue reference files to incorporate the  
239 identified motifs. The RE candidates were screened in the two individuals with CANVAS  
240 and the 31 non-CANVAS controls using exSTRa and EH, then the top candidate  
241 [(AAGGG)<sub>exp</sub> STR in *RFC1*] was further validated with TREDPARSE, GangSTR and  
242 STRetch. All tools were used with default parameters, with the following additional  
243 parameters for EH: read-depth of 30 and min-anchor-mapq of 20. All five tools were also  
244 used to screen for the (AAGGG)<sub>exp</sub> *RFC1* STR in the 69 Coriell control WGS datasets. A  
245 short-list of (AAGGG)<sub>exp</sub> carriers was generated based on consensus calling from at least four  
246 of the five tools.

247

248 Individuals diagnosed with CANVAS lacking the (AAGGG)<sub>exp</sub> *RFC1* RE were  
249 further screened with EHdn for novel STRs and for known pathogenic STRs using exSTRa  
250 and EH. The WES datasets could not be analyzed for the (AAGGG)<sub>exp</sub> *RFC1* RE as the  
251 intronic locus (chr4:39350045-39350095, hg19) was not captured during library preparation.  
252 However, the region was visualized using the Integrative Genomics Viewer (IGV) to identify  
253 potential off-target reads which could provide supportive evidence for the presence of the  
254 (AAGGG)<sub>exp</sub> motif. Only samples with at least one read mapping at the STR in the *RFC1*  
255 locus were considered.

256

### 257 **Haplotyping and mutation dating**

258 Haplotyping was performed on the WES data. Variants were filtered based on read depth  
259 ( $\geq 30$ ), including both exonic and non-exonic variants. A core haplotype was defined based on  
260 sharing amongst a majority of affected individuals. A method based on haplotype sharing<sup>42</sup>  
261 was used to determine the most recent common ancestor (MRCA) from whom the core  
262 haplotype was inherited, as well as dating additional sub-haplotypes shared by clusters of  
263 individuals, which are likely to be individuals with a MRCA who is more recent than that for  
264 the whole group (<https://shiny.wehi.edu.au/rafehi.h/mutation-dating/>).

265

### 266 **Molecular genetic studies**

267 We designed a PCR assay to test for presence of additional inserted sequence, not  
268 present in the reference database, at the *RFC1* STR. The primers (Table S1) flank the STR  
269 and are predicted to amplify a 253bp fragment using standard PCR conditions with a 30  
270 second extension cycle. Presence of the pathogenic *RFC1* RE was tested by repeat-primed  
271 PCR utilizing three primers; TPP\_CANVAS\_FAM\_2F, 5R\_TPP\_M13R\_CANVAS\_RE\_R  
272 and TPP\_M13R (Table S1). The FAM labelled forward primer is locus specific, while the  
273 repeat-specific primer (5R\_TPP) includes a tag M13R sequence. PCR was performed in a  
274 20 $\mu$ l reaction with 20 ng genomic DNA, 0.8  $\mu$ M of both the FAM labelled forward primer  
275 and TPP\_M13R and 0.2  $\mu$ M 5R\_TPP using GoTaq® Long PCR Polymerase (Promega). A  
276 standard 60TD55 protocol was utilized (94°C denaturation for 30 s, 60TD55°C anneal for 30  
277 s, and 72°C extension for 2 min), products were detected on an ABI3730xl DNA Analyzer  
278 and visualized using PeakScanner 2 (Applied Biosystems).

## 279 RESULTS

### 280 Case recruitment

281 The workflow for this study is summarized in Figure 1. Individuals with a clinical  
282 diagnosis of CANVAS were recruited following neurological assessment and investigation in  
283 accordance with published guidelines.<sup>43</sup> While variable between cases, data leading to the  
284 clinical diagnosis included evidence of combined cerebellar and bilateral vestibular  
285 impairment, cerebellar atrophy on MRI, neurophysiological evidence of impaired sensory  
286 nerve function and negative genetic testing for pathogenic RE at common SCA loci (typically  
287 *SCA1*, 2, 3, 6 and 7) and *FRDA* (Friedreich ataxia, FRDA). In total, the cohort consisted of 35  
288 individuals with a clinical diagnosis of CANVAS (Table 1). The individuals came from  
289 eleven families with a single affected individual, seven families with affected sib pairs and  
290 four larger/multigenerational families (Figure S1). A full clinical description of the cohort  
291 will be reported in a forthcoming manuscript.

292

### 293 Linkage analysis

294 CANVAS typically presents in families with one or multiple affected individuals in a  
295 single generation, consistent with a recessive inheritance. For example, in the second-degree  
296 consanguineous family CANVAS9, four siblings were diagnosed with CANVAS and two  
297 were classified as unaffected at the time phenotyping was performed (Figure 2A). Parametric  
298 multipoint linkage analysis was performed on five CANVAS families (CANVAS1, -2, -3, -4  
299 and -9, Figure S1) specifying a rare recessive disease model with complete penetrance. This  
300 identified linkage regions with logarithm of odds (LOD) scores ranging from 0.6 for smaller  
301 pedigrees (two affected siblings), to a statistically significant linkage region on chromosome  
302 4 in CANVAS9 (LOD=3.25, Figure 2B). Intersection of the linkage regions from the five  
303 families identified a single region on chromosome four (chr4:38887351-40463592, hg19,  
304 combined LOD=7.04) common to all families (Figure 2C). CNV analysis utilizing PennCNV  
305 did not identify any potential copy number variants in the minimal linkage region.<sup>44</sup> The  
306 1.5MB shared region contains 42 genes, of which 14 are protein coding, none with any  
307 association with ataxia in OMIM or the published literature (Table S2).

308

### 309 Large-scale WES analysis did not identify candidate pathogenic variants

310 WES was used to screen 27 affected individuals with CANVAS from 15 families for  
311 potentially pathogenic rare variants (MAF < 0.001) shared across multiple pedigrees in a

312 homozygous or compound heterozygous inheritance pattern. No candidate mutations were  
313 detected, either within the chromosome 4 linkage region or elsewhere in the genome.

314

### 315 **Identification of a novel (AAGGG)<sub>exp</sub> RE in the linkage region**

316 The lack of candidate variants identified from the WES data suggested the possibility  
317 of (i) intronic or intergenic mutations, or (ii) that CANVAS might be caused by a non-  
318 standard mutation, such as a pathogenic RE of an STR. Therefore, WGS was performed on  
319 two individuals from different pedigrees (CANVAS1 and CANVAS9) who share the chr4  
320 linkage region. EHdn was used to perform a genome-wide screen for STRs in the two  
321 individuals with CANVAS compared to WGS data from 31 unrelated controls. This  
322 identified 19 regions with a p value < 0.005 (Table S3), although genome-wide significance  
323 could not be achieved after adjustment for multiple testing due to the skewed ratio of the  
324 number of cases to controls (2 versus 31). These candidate STRs were visualized with the  
325 Integrative Genomics Viewer (IGV) tool, which suggested that the (AAGGG)<sub>exp</sub> STR within  
326 intron 2 of the gene encoding Replication Factor C1 (*RFC1*) was likely real and present in  
327 both alleles in the affected individuals, consistent with the recessive inheritance pattern  
328 hypothesized for CANVAS (Figure S2). In addition, this was the only candidate that (I) was  
329 localized to the chr4 linkage region and (II) was able to be validated using existing STR  
330 detection tools (see below). In both individuals with CANVAS, the novel (AAGGG)<sub>exp</sub>  
331 pentamer replaced an (AAAAG)<sub>11</sub> motif located at the same position in the reference genome  
332 (chr4:39350045-39350095, hg19) and appeared to be significantly expanded compared to  
333 controls. Visualization of the region in the UCSC genome browser identified that the  
334 reference motif (AAAAG)<sub>11</sub> is the 3' end of an Alu element, AluSx3. In individuals with  
335 CANVAS, the (AAAAG)<sub>11</sub> motif is substituted by the (AAGGG)<sub>exp</sub> motif, with potential  
336 interruptions to the Alu element (Figure 2D).

337

### 338 **Confirmation of (AAGGG)<sub>exp</sub> STR in off-target WES reads**

339 While WGS was only performed in two individuals with CANVAS, the majority of  
340 the cohort (n=27) was analyzed by WES. The putative pathogenic CANVAS RE is located in  
341 intron 2 of *RFC1*, 2863bp downstream of exon 2 and 2952bp upstream of exon 3. Therefore  
342 WES data is *a priori* assumed to be uninformative for this RE as it is not targeted during  
343 DNA capture. However, given that WES data includes off-target reads, we hypothesized that  
344 some reads might map to the *RFC1* RE locus. Visual assessment of the WES data in IGV  
345 identified 14 individuals with informative reads; the maximum off-target read coverage at

346 this locus was two, with a median of one read. While three individuals only had reads that  
347 correspond to the reference genome STR sequence (AAAAG), eleven affected individuals  
348 from nine families had reads containing (AAGGG) repeats (Table 1). Furthermore, single  
349 affected individuals from families CANVAS2 and CANVAS8 had single, independent reads  
350 identifying (AAGGG) and (AAAGG) motifs at the *RFC1* STR locus. This observation raised  
351 the possibility that CANVAS might result from pathogenic expansions of different  
352 pentanucleotide motifs.

353

### 354 **Computational validation with existing STR detection tools**

355 Multiple tools have been developed in recent years that test for the presence of REs at  
356 pre-defined STRs. Therefore, we inserted the novel *RFC1* STR motifs into the STR reference  
357 files and used exSTRa, EH, TREDPARSE, STRetch and GangSTR to estimate the size of the  
358 STR, and/or detect REs in the WGS data from the two original CANVAS samples  
359 (CANVAS1 and 9) and seven additional individuals with CANVAS. The seven additional  
360 CANVAS samples selected for WGS were those with WES evidence for an alternate  
361 (AAAGG) motif (families CANVAS2 and 8), and those who did not appear to have a RE at  
362 the *RFC1* locus based on the PCR/RP-PCR studies described below (CANVAS11, 13, 17 and  
363 19 families). The library preparation this second round of WGS was PCR-free as PCR  
364 amplification has previously been shown to affect RE detection.<sup>8</sup> Using exSTRa, we  
365 confirmed the homozygous inheritance of the (AAGGG)<sub>exp</sub> RE in three individuals  
366 (CANVAS1, 2 and 9, Figure 3). The empirical cumulative distribution function (ECDF)  
367 pattern for CANVAS2 is consistent with the presence of one shorter and one longer  
368 (AAGGG)<sub>exp</sub> RE, while CANVAS8 appears to only have a single (AAGGG)<sub>exp</sub> allele.  
369 Screening of all datasets for the (AAAGG)<sub>exp</sub> motif at the chr4 *RFC1* locus using exSTRa  
370 identified an expansion of this STR only in CANVAS8, suggesting this individual is a  
371 compound heterozygote, with an (AAGGG)<sub>exp</sub> RE on one allele and an (AAAGG)<sub>exp</sub> RE on  
372 the other. Visualization in IGV confirmed the presence of the (AAAGG)<sub>n</sub> motif embedded  
373 within the reference STR: (AAAAG)<sub>6</sub>-(AAAGG)<sub>n</sub>-(AAAAG)<sub>6</sub> (Figure S3). This observation  
374 raises the possibility that an expanded (AAAGG)<sub>exp</sub> motif might also be associated with  
375 CANVAS.

376

377 EH, TREDPARSE and GangSTR were used to estimate the length of the AAGGG  
378 motif on each allele (Figure 3). The results were highly variable depending on the tool used.  
379 EH reported minimum and maximum allele sizes ranging from 30 to 68 in individuals with

380 the RE. The allele size ranges estimated by GangSTR and TREPARE were 2 to 27 and 7 to  
381 14, respectively. Furthermore, all three tools inferred the presence of two alleles, even in  
382 individuals who carry a single allele, and hence do not appear to be distinguishing read  
383 contributions between the alleles, also contributing to unreliable size estimates. Reads  
384 comprised of the (AAGGG)<sub>exp</sub> motif in particular also showed evidence of high read  
385 sequencing error. Based on these results, we can infer that while the CANVAS samples were  
386 all correctly identified as having homozygous RE at *RFC1*, estimates of expansion size are  
387 inconsistent and appear likely to significantly underestimate the actual repeat size.

388

389 The consensus of the different tools was that CANVAS11, 13, 17 and 19 families did  
390 not encode a pathogenic RE [either (AAGGG)<sub>exp</sub> or (AAAGG)<sub>exp</sub>] at the *RFC1* locus, which  
391 we confirmed by PCR analyses (see below). However, the *RFC1* (AAGGG)<sub>exp</sub> RE was  
392 present in three of the control WGS datasets [two heterozygous, one homozygous, allele  
393 frequency ~0.06 (4/62), Figure 3]. No control individuals were identified to carry the  
394 (AAAGG)<sub>exp</sub> motif. As with the CANVAS samples, the STR sizing estimates using the  
395 different tools was inconsistent, therefore no conclusions could be drawn from this *in silico*  
396 analysis regarding the relative size of the (AAGGG)<sub>exp</sub> RE in controls compared to  
397 individuals with CANVAS. We then analyzed a larger in-house collection of unrelated  
398 control Coriell WGS samples (N=69) and again failed to identify the (AAAGG)<sub>exp</sub> motif.  
399 However, we identified six individuals heterozygous for the (AAGGG)<sub>exp</sub> RE, representing a  
400 frequency estimate of ~0.04 [(6/138) (Figure S4)]. Using the NGS QC software tool peddy,  
401 we found evidence that two of these heterozygous individuals are of European ancestry and  
402 that two further individuals are of admixed Native American ancestry. Finally, we accessed  
403 WGS from GTEx for 133 individuals who have matching brain (cerebellum) RNA-seq. Our  
404 analysis identified 11 heterozygous carriers of the (AAGGG)<sub>exp</sub> RE, representing an  
405 estimated allele frequency of ~0.04 (11/266), consistent with our in-house collection.

406

#### 407 **Validation of the (AAGGG)<sub>n</sub> RE as the causal variant for CANVAS**

408 We developed a PCR assay that amplifies across the repeat tract to rapidly screen for  
409 the presence of a non-expanded allele at the *RFC1* STR. Although the screen does not  
410 distinguish between the (AAAAG)<sub>11</sub> reference STR, the (AAGGG) STR, or any other  
411 potential motif, amplification of an ~250bp fragment indicates at least one allele is not  
412 expanded. Moreover, the presence of two distinct non-expanded products is indicative of a  
413 heterozygous non-mutant state. Conversely, the complete absence of the PCR product

414 provides indirect evidence of a RE affecting both alleles of the *RFC1* locus. Analysis of all  
415 available DNA samples from individuals with CANVAS suggested that the reference STR at  
416 the *RFC1* locus was not present in 30 clinically diagnosed individuals from 18 (of 22)  
417 CANVAS families (Table 1, Figure 4). Notably, unaffected individuals from *RFC1* positive  
418 families carried at least one non-expanded *RFC1* allele (Figure S5). To directly confirm  
419 expansion of the novel (AAGGG) motif in *RFC1*, we developed a locus specific repeat-  
420 primed PCR assay, using a primer located adjacent to the *RFC1* repeat and an AAGGG-  
421 specific primer. Consistent with the PCR assay, affected individuals from the 18 families  
422 demonstrated a saw-toothed ‘ladder’ when the repeat-primed PCR products were analyzed by  
423 capillary array (Table 1, Figure 4). These results suggest a homozygous RE underlies  
424 CANVAS in these 18 families, and at least one pathogenic allele encodes the (AAGGG)<sub>exp</sub>  
425 RE. Molecular analysis of the DNA for the three in-house control individuals with the *in*  
426 *silico* predicted (AAGGG)<sub>exp</sub> motif (Figure 3) demonstrated a ~250bp product in both  
427 heterozygous samples but no product in the homozygous individual. The repeat-primed assay  
428 demonstrated a saw-toothed ladder in all three samples (Figure S6). Collectively, these  
429 analyses suggested all three control individuals have at least one copy of the pathogenic  
430 (AAGGG)<sub>exp</sub> RE at *RFC1*, although the size of the RE cannot be determined by these  
431 analyses.

432

433 In four families (CANVAS11, 13, 17 and 19) the presence of the expected reference  
434 PCR amplicon and lack of a repeat-primed PCR product suggested the pathogenic *RFC1* RE  
435 was not present on either allele. This implied that these individuals have a different  
436 CANVAS-causing mutation in *RFC1*, or there is locus heterogeneity. A third possibility is  
437 that they do not have CANVAS but instead a related ataxia. Therefore, we performed WGS  
438 on these individuals and initially screened for known REs associated with ataxias using  
439 exSTRa and EH. A CAG trinucleotide expansion in *ATXN3*, associated with spino-cerebellar  
440 ataxia type 3 (SCA3; OMIM 109150 also known as Machado-Josephs disease) was identified  
441 in CANVAS13 (Figure S7) and confirmed by diagnostic testing. The WGS was then screened  
442 for novel or rare SNPs and indels in genes known to cause ataxia. No *de novo* or rare variants  
443 were identified in *RFC1* however a potential genomic re-diagnosis was achieved in two  
444 additional families. In CANVAS17 two variants [NM\_001278055:c.12398delT,  
445 p.(Phe4133Serfs\*28) and NM\_001278055:c.5306T>A, p.(Val1769Asp)] were identified in  
446 the gene encoding saccin (*SACS*) and segregation analysis confirmed they were in trans.  
447 Biallelic mutations in *SACS* cause spastic ataxia of the Charlevoix-Saguenay type (MIM:

448 270550). In CANVAS19, a heterozygous variant in the gene encoding FAT tumor suppressor  
449 homolog 2 [*FAT2*, NM\_001447.2:c.4370T>C, p.(Val1457Ala)] was identified. Heterozygous  
450 mutations in *FAT2* have recently been associated with SCA45 (MIM: 604269).<sup>45</sup> No  
451 potentially pathogenic variants were identified in CANVAS11, however a variant of  
452 unknown significance was identified in the gene encoding Ataxin 7 [*ATXN7*,  
453 NM\_001177387.1:c.2827C>G, p.(Arg943Gly)]. CANVAS11 was also screened genome-  
454 wide with EHDn for potentially pathogenic novel RE, however no additional candidate REs  
455 were identified.

456

#### 457 **A single founder event for the (AAGGG)<sub>n</sub> RE in *RFC1***

458 We performed haplotype analysis to determine if the (AAGGG)<sub>exp</sub> RE arose more  
459 than once in human history. Analysis of haplotypes inferred from the WES data identified a  
460 core ancestral haplotype, comprised of 27 SNPs (Figure 5A), that was shared by most  
461 individuals except CANVAS14 (Table 1, Table S4). The core haplotype spans four genes  
462 (*TMEM156*, *KLHL5*, *WDR19* and *RFC1*) and is 0.36 MB in size (chr4:38995374-39353137  
463 (hg19)). Inspection of this region in the UCSC browser suggested that the core haplotype  
464 overlaps with a region of strong linkage disequilibrium in European and Asian populations  
465 (Han Chinese and Japanese from Tokyo), but not the Yoruba population (an ethnic group  
466 from West Africa, Figure 5B). Using a DNA recombination and haplotype-based mutation  
467 dating technique<sup>42</sup>, we estimate that the most recent common ancestor (MRCA) of the  
468 CANVAS cohort lived approximately 25,880 (CI: 14080-48020) years ago (Figure 5C). This  
469 age estimate corresponds to the size of the haplotype and LD block and is roughly equivalent  
470 to the origin of modern Europeans as represented by the HAPMAP CEU cohort. Further  
471 investigation of the haplotypes allowed us to infer a simple phylogeny based on identified  
472 clusters of shared haplotypes extending beyond the core haplotype, suggesting that some  
473 individuals have common ancestors more recent than that of the MRCA for the whole group.  
474 This approach identified four subgroups. Group A had a MRCA dating back 5,600 (CI: 2120-  
475 15520) years and group B (further divided into groups B1 and B2) have a MRCA dating back  
476 4,180 years (CI: 2240-7940). Furthermore, one individual shared part of their haplotype with  
477 both groups A and B, suggesting that group B is a distant branch of the MRCA of group A.  
478 Another subgroup, C, has a MRCA that lived 1860 (CI: 560-7020) years ago. The final group  
479 labelled N, do not have any additional sharing beyond the core haplotype.

480 Next, we compared the haplotype of the nine control samples (three in-house controls  
481 and six from the Coriell collection) that carry the (AAGGG)<sub>exp</sub> RE to the core haplotype



482 defined in the individuals with CANVAS. All controls shared at least part of the core  
483 haplotype, again suggesting that the (AAGGG)<sub>exp</sub> RE arose once in history. Finally, we  
484 determined that nine of the 11 individuals from GTEx heterozygous for the (AAGGG)<sub>exp</sub> RE  
485 also shared the same core haplotype identified in individuals with CANVAS. The haplotype-  
486 specific SNP rs2066782 (exon 18, chr4:39303925, A>G) enabled us to analyse the  
487 expression of the (AAGGG)<sub>exp</sub> *RFC1* allele in the cerebellum RNA-seq data and confirm that  
488 the STR did not inhibit the expression of *RFC1* compared to the reference (AAAAG)<sub>11</sub> allele.  
489 The remaining two carriers do not appear to share the core haplotype. As they do not have  
490 heterozygous SNPs in their exons, allele specific expression could not be determined.

491 **DISCUSSION**

492           Since the first description of the syndrome of cerebellar ataxia with bilateral  
493 vestibulopathy in 2004<sup>46</sup> and proposal of CANVAS as a distinct clinical entity in 2011<sup>11</sup> there  
494 has been little progress made in delineating the etiology of the disorder. While most affected  
495 individuals are described as idiopathic, reports of multiple affected sib pairs<sup>12</sup> and a family  
496 with three affected individuals<sup>47</sup> have suggested that an autosomal recessive mode of  
497 inheritance is most likely. The genetic basis of CANVAS has now been identified and  
498 validated in two independent studies, one recently published by Cortese *et al*<sup>32</sup> and this study.  
499 Both studies utilized a similar study design, with linkage analysis to reduce the genomic  
500 search space to a modest interval (<2Mb), but no plausible causal variant(s) could be  
501 identified in WES data. WGS was then performed on multiple individuals and Cortese *et al*  
502 successfully identified the RE by visual inspection of the aligned read pairs inside the linkage  
503 region using the Integrative Genomics Viewer. In contrast, we utilized a bioinformatics  
504 approach and performed genome-wide analysis of WGS data to identify potential RE and  
505 then prioritized the RE located within the linkage interval. While both approaches were  
506 successful, the bioinformatics approach to RE detection, as described in this study, is likely  
507 more sensitive and practical, and can be applied even in the absence of a small, or indeed any,  
508 linkage region. Furthermore, using a bioinformatics approach allows simultaneous testing of  
509 other potentially causal RE due to differential diagnoses. For example, we quickly re-  
510 diagnosed an affected individual with a pathogenic SCA3 RE.

511

512           Previously, the only variant associated with CANVAS was a heterozygous missense  
513 variant in the gene encoding E74 Like ETS Transcription Factor 2 (*ELF2*), which segregated  
514 with the disorder in three individuals in a single family.<sup>47</sup> It is now apparent that the majority  
515 of individuals with CANVAS result from the homozygous inheritance of an expanded  
516 intronic pentamer in *RFC1*. We found the (AAGGG)<sub>exp</sub> in 30 of 31 individuals with a RE at  
517 this locus. In only a single individual did we observe a different, presumably pathogenic  
518 motif; CANVAS8 had one allele with the (AAGGG)<sub>exp</sub>, whereas the second allele appeared  
519 to consist of an (AAAGG)<sub>exp</sub>. Notably, this alternate motif does not share the AAGGG  
520 haplotype (Figure S3). Analysis of the core haplotype in the majority of individuals with  
521 CANVAS suggests that the (AAGGG)<sub>exp</sub> RE arose once, approximately 25,000 years ago,  
522 most likely in Europe. While the majority of individuals in our cohort who carry the  
523 (AAGGG)<sub>n</sub> RE are of European ancestry, the RE is also present in non-European individuals,  
524 including a Lebanese family and two carriers of admixed Native American ancestry. Given

525 the age of the CANVAS RE and recent human admixture it is likely that the locus may  
526 underlie CANVAS in apparently non-European individuals, despite the disorder being highly  
527 overrepresented in European populations.

528

529         Importantly, Cortese *et al* extend the clinical significance of the CANVAS RE by  
530 demonstrating it is potentially a common cause of unsolved ataxia not meeting the diagnostic  
531 criteria of CANVAS. Screening for homozygous inheritance of the (AAGGG)<sub>exp</sub> RE in a  
532 cohort of 150 individuals with sporadic late-onset ataxia diagnosed 33 individuals (22%).  
533 This is consistent with the relatively high allele frequency of the (AAGGG)<sub>exp</sub> we report in  
534 this paper. Collectively, the two studies screened for the RE in a total of 537 clinically normal  
535 samples, identifying 23 heterozygous and a single homozygous individual (allele frequency  
536  $25/1074=0.023$ ). Given that the allele size and RE composition could not be determined in all  
537 controls, it is possible that the unaffected homozygous individual we identified carries two  
538 alleles smaller than the pathogenic range of >400 repeats reported by Cortese *et al*. However,  
539 the individual is less than half the mean age of CANVAS onset (~60 years) and the lack of  
540 phenotype suggests the clinical features are yet to manifest.

541

#### 542 **Mechanism of pathogenicity**

543         There are multiple mechanisms by which RE can lead to pathogenicity, including  
544 RNA toxicity, protein toxicity and loss or gain of function.<sup>7</sup> It is not yet known how the  
545 (AAGGG)<sub>exp</sub> RE in *RFC1* causes CANVAS, however the homozygous inheritance pattern  
546 suggests a loss-of-function mechanism, rather than RNA or protein toxicity. In heterozygous  
547 carriers of the (AAGGG)<sub>exp</sub> RE, our analysis of the GTEx RNA-seq data using haplotype  
548 tagging SNPs suggested that the pathogenic (AAGGG)<sub>exp</sub> allele did not inhibit expression of  
549 *RFC1* compared to the reference (AAAAG)<sub>11</sub> allele. Interestingly, Cortese *et al* also were  
550 unable to determine a mechanism of action. The (AAGGG)<sub>exp</sub> RE did not appear to alter  
551 expression levels of *RFC1* or surrounding genes as determined by bulk RNAseq and qRT-  
552 PCR. Similarly, *RFC1* expression and protein levels appeared unchanged in peripheral or  
553 brain tissue derived from individuals with CANVAS, and no AAGGG RNA foci deposits  
554 were observed.<sup>32</sup> While *RFC1* has not been previously associated with any disorder, it  
555 appears extremely intolerant to LoF (pLI = 0.97; observed/expected = 0.18, CI 0.12-0.31).<sup>48</sup>  
556 In addition, siblings in the families studied carried the pathogenic RE in a heterozygous state  
557 but did not manifest any signs of the disorder. This observation is analogous to Friedreich's

558 ataxia, a recessive genetic ataxia caused by loss of function (LoF) of FRDA due to a  
559 pathogenic intronic RE.

560

561 *RFC1* encodes a subunit of replication factor C, a five-subunit protein complex  
562 required for DNA replication and repair. Analysis of the Genotype-Tissue Expression  
563 (GTEx) database demonstrated significant expression of *RFC1* in brain tissue, particularly the  
564 cerebellum. Replication factor C catalyzes opening the protein ring of proliferating cell  
565 nuclear antigen (PCNA), allowing it to encircle the DNA and function as a scaffold to recruit  
566 proteins involved in DNA replication, repair and remodeling.<sup>49</sup> Mutations in multiple DNA  
567 replication and repair genes such as *TCD1*, *PNKP*, *XRCC1* and *APTX* result in ataxia<sup>50</sup>,  
568 highlighting the central role of this pathway in these overlapping disorders. One of the best  
569 known examples is the severe and early onset autosomal recessive disorder, ataxia  
570 telangiectasia, which is caused by mutations in the gene encoding ATM serine/threonine  
571 kinase (*ATM*), which is important for the repair of DNA double-strand breaks.<sup>51</sup>

572

573 The minimum pathogenic length and fine structure of the *RFC1* RE is currently  
574 unclear. While Cortese et al reported a pathogenic range of ~400-2000, the individual repeat  
575 composition and a more precise repeat length was not determined. The short-read NGS  
576 technologies utilized in this study were unable to extend more than ~100bp into the repeat  
577 sequence and efforts to amplify across the region using long range PCR were unsuccessful.  
578 While the repeat-primed PCR assay indicates the presence of the (AAGGG)<sub>exp</sub> motif, it does  
579 not extend beyond ~250bp (50 repeat units). The application of long read sequencing  
580 technologies currently being developed for RE disorders will be required to accurately  
581 elucidate both the length of the pathogenic allele and the repeat composition. Both of these  
582 parameters provide important clinical information regarding onset, progression and  
583 pathogenicity in other genetic ataxias such as SCA1 and Friedreich ataxia.<sup>52; 53</sup> Additional  
584 studies will also be required to elucidate the nature of the *RFC1* STR in control individuals.  
585 Cortese *et al* demonstrated considerable variability is present in the size and composition of  
586 the STR, but details regarding the size and composition of both normal and pathogenic alleles  
587 are yet to be fully determined. We show that the (AAGGG)<sub>exp</sub> RE occurs within the 3 prime  
588 end of the Alu element, AluSx3. Alu elements typically have A-rich tails and in the reference  
589 sequence the *RFC1* Alu has an A-rich tail containing an (AAAAG)<sub>11</sub> STR. There is some  
590 evidence that motifs that follow the pattern A<sub>n</sub>G<sub>m</sub>, especially (AAAG)<sub>n</sub> and (AAAGG)<sub>n</sub>,  
591 display strong base-stacking interactions and are more likely to expand through replication

592 slippage.<sup>31</sup> This suggests an inherent mitotic instability of A and G rich motifs, consistent  
593 with what we observe in CANVAS. Notably, a number of pathogenic RE located with Alu  
594 have previously been described, including SCA10, SCA31, SCA37 and Friedreich ataxia.<sup>22;</sup>  
595 26; 54; 55

596

### 597 **Genomic re-diagnosis in CANVAS**

598 Four of twenty two families enrolled in this study with a clinical diagnosis of  
599 CANVAS did not harbor the RE or any other potentially pathogenic variants in the *RFC1*  
600 locus. CANVAS13 was re-diagnosed with SCA3 after the WGS data was analyzed using our  
601 computational pipeline for detecting known pathogenic REs. In addition to cerebellar ataxia,  
602 individuals with SCA3 not uncommonly manifests a somatosensory impairment<sup>56; 57</sup> and  
603 vestibular involvement may be variably present<sup>57</sup>, resulting in a phenotype indistinguishable  
604 from CANVAS.<sup>43</sup> This molecular re-diagnosis highlights the power of modern STR detection  
605 techniques to diagnose RE ataxias. In addition, NGS data provides the opportunity to  
606 simultaneously identify non-RE mediated causes of ataxia. In CANVAS17 we identified  
607 biallelic variants in *SACS* as the likely cause of disease. While individuals with spastic ataxia  
608 of the Charlevoix-Saguenay type may present with the combination of cerebellar ataxia and a  
609 peripheral neuropathy<sup>58; 59</sup> as seen in CANVAS, to our knowledge vestibular involvement has  
610 not previously been described, and so this potentially constitutes a novel manifestation of the  
611 disease. In addition, a very plausible heterozygous variant was identified in *FAT2* in  
612 CANVAS19. While classified as a VUS using ACMG guidelines,<sup>60</sup> the variant is only  
613 observed once in gnomAD and was predicted pathogenic by multiple *in silico* algorithms.  
614 Very recently, heterozygous point mutations affecting the last cadherin domain  
615 (p.Lys3586Asn) or the linker region (p.Arg3649Gln) of *FAT2* have been associated with  
616 SCA45, adding weight to classifying the variant (p.Val1457Ala) in the thirteenth cadherin  
617 domain, as likely pathogenic. While the published clinical phenotype and mutation spectrum  
618 in SCA45 is limited, in common with CANVAS, it is a late onset and slowly progressive  
619 cerebellar ataxia.<sup>45</sup>

620

### 621 **Strengths and limitations of current STR detection tools**

622 In this study, we implemented multiple computational tools to identify and validate  
623 the presence of a novel (AAGGG)<sub>exp</sub> RE in the majority of individuals with a clinical  
624 diagnosis of CANVAS. In particular, the use of EHdn, with its non-reference based RE  
625 discovery framework, was crucial in identifying a putative candidate, with the reference-

626 based STR detection tools facilitating the follow up analysis. Although all tools gave highly  
627 variable estimated repeat sizes, which are likely to be significantly less than the actual repeat  
628 size, they provided consistent evidence that the (AAGGG) motif was expanded. This level of  
629 evidence is helpful before embarking on the potentially complex process of molecular  
630 validation. In our analysis, only a single tool (GangSTR) failed to detect the alternate  
631 (AAAGG)<sub>exp</sub> RE. It is not clear why this was the case, although it could be related to the  
632 more complicated [(AAAAG)<sub>6</sub>-(AAAGG)<sub>exp</sub>-(AAAAG)<sub>6</sub>] repeat structure. Notably, EHdn  
633 was able to identify the (AAAGG)<sub>exp</sub> RE in CANVAS8-8, however genome wide  
634 significance was not achieved and the motif was less highly ranked based on p-value than the  
635 initial discovery of AAGGG (Table S3). This is likely due to the fact that the RE was only  
636 present in one copy and power was reduced as there was only a single case and a small  
637 number of controls. EHdn appears most effective as a discovery tool when used with multiple  
638 cases or larger numbers of controls. The results of this study highlight the importance of  
639 utilizing multiple tools to provide redundancy in the data analysis pipeline. We have now  
640 updated the exSTRa package (see weblinks below) to include CANVAS and other recently  
641 described pathogenic RE, providing additional utility to the research community to rapidly  
642 identify these RE in their cohorts. An additional issue we encountered, which potentially  
643 limited all tools, was the poor sequencing quality in reads containing the (AAGGG) motif  
644 compared to other STRs.

645

646 In conclusion, in this study we show that a recessively inherited, ancient RE located in  
647 intron 2 of *RFC1* is the predominant cause of CANVAS. Recently developed RE discovery  
648 tools facilitated the identification and verification of this novel RE, in addition to identifying  
649 other genetic causes of disease in the cohort. Despite the RE being located in an intron, we  
650 demonstrate that previously generated WES data with low-coverage genome-wide off target  
651 reads were helpful in providing increased statistical confidence in RE identification.  
652 Therefore, reanalysis of previously generated WES datasets potentially offers a cost effective  
653 approach to facilitating identification of novel intronic RE in discovery projects. Finally, we  
654 anticipate that implementation of these tools into routine diagnostic pipelines has the  
655 potential to significantly increase the current diagnostic rates of 36% and 17%, recorded for  
656 clinical exome and targeted panel analyses of individuals with ataxia, respectively.<sup>61; 62</sup>

657 **SUPPLEMENTAL DATA**

658 The supplemental data contain 7 figures and 4 tables.

659

660 **CONFLICTS OF INTEREST**

661 The authors declare no conflicts of interest.

662

663 **ACKNOWLEDGMENTS**

664 We acknowledge access to the dataset EGA00001003562 from the European Genome-  
665 Phenome Archive. This work was supported by the Australian Government National Health  
666 and Medical Research Council (Program Grant 1054618 to MB), the NIH (NINDS grant  
667 R01NS082094 to BLF) and the Murdoch Children's Research Institute. MB was supported  
668 by an NHMRC Senior Research Fellowship (1102971) and DPB was supported by a  
669 Wellcome Clinical Research Career Development Fellowship. Additional funding was  
670 provided by the Independent Research Institute Infrastructure Support Scheme and the  
671 Victorian State Government Operational Infrastructure Program.

672

673 **WEB RESOURCES**

674 exSTRa: <https://github.com/bahlolab/exSTRa>

675 Genotype-Tissue Expression (GTEx) project: <https://gtexportal.org/home/>

676 Genome Aggregation Database (gnomAD): <http://gnomad.broadinstitute.org/>

677 Integrative Genomics Viewer (IGV): <http://software.broadinstitute.org/software/igv/>

678 Online Mendelian Inheritance in Man: <http://www.omim.org/>

679 UCSC Genome Bioinformatics database: <https://genome.ucsc.edu/>

680 Varsome: <https://varsome.com>

681

682 **ACCESSION NUMBERS**

683 The ClinVar details for the *RFC1* variants reported in this paper are accessible via submission  
684 SUB5220746.

685

686 **LEGENDS**

687 **Figure 1: Overview of the CANVAS study and genetic investigations performed.**

688

689 **Figure 2: Linkage of the CANVAS locus to chromosome 4 and identification of**  
690 **(AAGGG)<sub>exp</sub> intronic insertion in *RFC1***

691 A. The pedigree of the family CANVAS9 highlights the apparent recessive inheritance  
692 pattern. B. Linkage analysis of CANVAS9 identified significant linkage to chromosome 4  
693 (LOD=3.25). C. Linkage regions for individual families CANVAS1, 2, 3, 4 and 9 are shown  
694 in blue and the overlapping region shown in red (chr4:38887351-40463592, combined  
695 LOD=7.04). D. STR analysis of WGS from two unrelated individuals with CANVAS  
696 identified a novel expanded STR in the second intron of *RFC1*. The (AAAAG)<sub>11</sub> motif that is  
697 present in the reference genome and part of an existing Alu element (AluSx3) is replaced by  
698 the (AAGGG)<sub>exp</sub> RE.

699

### 700 **Figure 3: Computational validation of the (AAGGG)<sub>exp</sub> RE**

701 The (AAGGG)<sub>exp</sub> RE at the coordinates chr4:39350045-39350095 was added to the reference  
702 databases of the tools exSTRa, EH, GangSTR, TREDPARSE and STRetch and WGS data  
703 from four unrelated individuals with CANVAS was analysed [CANVAS1 (orange),  
704 CANVAS2 (blue), CANVAS8 (red) and CANVAS9 (green)]. The non-CANVAS controls  
705 are presented in grey. Plots have been divided into PCR-based and PCR-free WGS (left and  
706 right columns, respectively). The Y and X axes for ExpansionHunter, GangSTR and  
707 TREDPARSE refer to the number of repeat units on the longer and shorter allele per  
708 individual, respectively. The Y axis for the STRetch plot refers to the number of individuals.  
709

### 710 **Figure 4: Genetic validation of the (AAGGG)<sub>exp</sub> RE**

711 A. PCR analysis of the *RFC1* STR failed to produce the control ~253bp reference product in  
712 18 of 22 CANVAS families. Representative images of the repeat-primed PCR for the  
713 (AAGGG)<sub>exp</sub> RE demonstrating a saw-toothed product with 5 base pair repeat unit size,  
714 amplified from gDNA of individuals from CANVAS1 (B) and CANVAS9 (C). No product  
715 was observed for the unaffected control (D) and no gDNA template negative control (E).  
716

### 717 **Figure 5: The majority of individuals with CANVAS encode an ancestral haplotype**

718 A. Analysis of WES data identified an ancestral haplotype surrounding *RFC1* in all affected  
719 individuals confirmed to carry the (AAGGG)<sub>exp</sub> RE. B. The core haplotype (blue highlight)  
720 was intersected with the linkage disequilibrium (LD) track in the UCSC browser (converted  
721 to hg18 coordinates). The three LD tracks represent the Yoruba population (top track),  
722 Europeans (middle) and Han Chinese and Japanese from Tokyo (bottom). Red areas indicate  
723 strong linkage disequilibrium. The core CANVAS haplotype spans a large LD block in  
724 Europeans, which is broken up into two LD blocks in Japanese and Chinese, suggesting an



725 ancient origin for the CANVAS repeat expansion allele. C. Haplotype sharing between  
726 individuals with CANVAS was used to determine the age of the most recent common  
727 ancestor (MRCA) of the cohort.

728 **Table 1: Clinical features and genetic analysis of *RFC1* locus in study participants.**

| Family   | Participants (sex) | SNP array | WES | WGS | <i>RFC1</i> STR in WES | PCR wildtype allele | Repeat-primed PCR | Genetic Diagnosis | Haplotype    | Ethnicity          |
|----------|--------------------|-----------|-----|-----|------------------------|---------------------|-------------------|-------------------|--------------|--------------------|
| CANVAS1  | 2 (F)              | ✓         | ✓   | ✓   | ND                     | ✗                   | ✓                 | CANVAS            | A/other      | European           |
| CANVAS2  | 2 (M)              | ✓         | ✓   | ✓   | AAGGG and AAAGG        | ✗                   | ✓                 | CANVAS            | A            | European           |
| CANVAS3  | 2 (F)              | ✓         | ✓   | ✗   | AAGGG                  | ✗                   | ✓                 | CANVAS            | A            | European           |
| CANVAS4  | 4 (3M,1F)          | ✓         | ✓   | ✗   | AAGGG                  | ✗                   | ✓                 | CANVAS            | A            | Greek-Cypriot      |
| CANVAS5  | 2 (M,F)            | ✗         | ✗   | ✗   | ND                     | ✗                   | ✓                 | CANVAS            | Not assessed | Not reported       |
| CANVAS6  | 2 (M)              | ✗         | ✓   | ✗   | AAGGG                  | ✗                   | ✓                 | CANVAS            | A            | Lithuanian/Latvian |
| CANVAS7  | 1 (M)              | ✗         | ✓   | ✗   | ND                     | ✗                   | ✓                 | CANVAS            | A            | European-Maori     |
| CANVAS8  | 1 (F)              | ✗         | ✓   | ✓   | AAGGG and AAAGG        | ✗                   | ✓                 | CANVAS            | A/other      | European           |
| CANVAS9  | 4 (1M,3F)          | ✗         | ✓   | ✓   | AAGGG                  | ✗                   | ✓                 | CANVAS            | A            | Lebanese           |
| CANVAS10 | 1 (M)              | ✗         | ✓   | ✗   | AAGGG                  | ✗                   | ✓                 | CANVAS            | A            | European           |
| CANVAS11 | 1 (M)              | ✗         | ✓   | ✓   | ND                     | ✓                   | ✗                 | ?                 | NA           | Anglo-saxon        |
| CANVAS12 | 1 (M)              | ✗         | ✓   | ✗   | ND                     | ✗                   | ✓                 | CANVAS            | A            | Turkish            |
| CANVAS13 | 1 (M)              | ✗         | ✓   | ✓   | Reference              | ✓                   | ✗                 | SCA3              | NA           | Martinique         |
| CANVAS14 | 1 (M)              | ✗         | ✓   | ✗   | AAGGG                  | ✗                   | ✓                 | CANVAS            | Other*       | European           |
| CANVAS16 | 1 (F)              | ✗         | ✗   | ✗   | NA                     | ✗                   | ✓                 | CANVAS            | Not assessed | European           |
| CANVAS17 | 2 (M)              | ✗         | ✓   | ✓   | Reference              | ✓                   | ✗                 | SACS              | NA           | European           |

|          |           |   |   |   |    |   |   |        |              |                |
|----------|-----------|---|---|---|----|---|---|--------|--------------|----------------|
| CANVAS18 | 1 (F)     | x | ✓ | x | ND | x | ✓ | CANVAS | A            | European-Maori |
| CANVAS19 | 1 (F)     | x | x | ✓ | NA | ✓ | x | SCA45  | Not assessed | European       |
| CANVAS20 | 2 (1M,1F) | x | x | x | NA | x | ✓ | CANVAS | Not assessed | Spanish        |
| CANVAS21 | 1 (M)     | x | x | x | NA | x | ✓ | CANVAS | Not assessed | Indian         |
| CANVAS22 | 1 (M)     | x | x | x | NA | x | ✓ | CANVAS | Not assessed | Hungarian      |
| CANVAS23 | 1 (U)     | x | x | x | NA | x | ✓ | CANVAS | Not assessed | Not reported   |

729

730 M=male, F=female, U=deidentified, NA=not applicable, ND=not detected, Other\*= a different haplotype OR shortened A haplotpye

731 The gene reference sequences utilized were NC\_000004 and NM\_002913 (RFC1).

732

733

734

735

736 **REFERENCES**

737

- 738 1. McMurray, C.T. (2010). Mechanisms of trinucleotide repeat instability during human development. *Nat Rev*  
739 *Genet* 11, 786-799.
- 740 2. Gymrek, M., Willems, T., Guilmatre, A., Zeng, H., Markus, B., Georgiev, S., Daly, M.J., Price, A.L.,  
741 Pritchard, J.K., Sharp, A.J., et al. (2016). Abundant contribution of short tandem repeats to gene  
742 expression variation in humans. *Nature genetics* 48, 22-29.
- 743 3. Quilez, J., Guilmatre, A., Garg, P., Highnam, G., Gymrek, M., Erlich, Y., Joshi, R.S., Mittelman, D., and  
744 Sharp, A.J. (2016). Polymorphic tandem repeats within gene promoters act as modifiers of gene  
745 expression and DNA methylation in humans. *Nucleic Acids Res* 44, 3750-3762.
- 746 4. Benson, G. (1999). Tandem repeats finder: a program to analyze DNA sequences. *Nucleic Acids Res* 27, 573-  
747 580.
- 748 5. Subramanian, S., Madgula, V.M., George, R., Mishra, R.K., Pandit, M.W., Kumar, C.S., and Singh, L.  
749 (2003). Triplet repeats in human genome: distribution and their association with genes and other  
750 genomic regions. *Bioinformatics* 19, 549-552.
- 751 6. La Spada, A.R., and Taylor, J.P. (2010). Repeat expansion disease: progress and puzzles in disease  
752 pathogenesis. *Nat Rev Genet* 11, 247-258.
- 753 7. Hannan, A.J. (2018). Tandem repeats mediating genetic plasticity in health and disease. *Nat Rev Genet* 19,  
754 286-298.
- 755 8. Tankard, R.M., Bennett, M.F., Degorski, P., Delatycki, M.B., Lockhart, P.J., and Bahlo, M. (2018). Detecting  
756 Expansions of Tandem Repeats in Cohorts Sequenced with Short-Read Sequencing Data. *American*  
757 *journal of human genetics* 103, 858-873.
- 758 9. Ruano, L., Melo, C., Silva, M.C., and Coutinho, P. (2014). The global epidemiology of hereditary ataxia and  
759 spastic paraplegia: a systematic review of prevalence studies. *Neuroepidemiology* 42, 174-183.
- 760 10. Bird, T.D. (2018 Update). Hereditary Ataxia Overview. In *GeneReviews*(R), M.P. Adam, H.H. Ardinger,  
761 R.A. Pagon, S.E. Wallace, L.J.H. Bean, K. Stephens, and A. Amemiya, eds. (Seattle (WA)).
- 762 11. Szmulewicz, D.J., Waterston, J.A., Halmagyi, G.M., Mossman, S., Chancellor, A.M., McLean, C.A., and  
763 Storey, E. (2011). Sensory neuropathy as part of the cerebellar ataxia neuropathy vestibular areflexia  
764 syndrome. *Neurology* 76, 1903-1910.
- 765 12. Szmulewicz, D.J., McLean, C.A., MacDougall, H.G., Roberts, L., Storey, E., and Halmagyi, G.M. (2014).  
766 CANVAS an update: clinical presentation, investigation and management. *J Vestib Res* 24, 465-474.
- 767 13. Harding, A.E. (1981). "Idiopathic" late onset cerebellar ataxia. A clinical and genetic study of 36 cases. *J*  
768 *Neurol Sci* 51, 259-271.
- 769 14. Szmulewicz, D.J. (2017). Combined Central and Peripheral Degenerative Vestibular Disorders: CANVAS,  
770 Idiopathic Cerebellar Ataxia with Bilateral Vestibulopathy (CABV) and Other Differential Diagnoses  
771 of the CABV Phenotype. *Curr Otorhinolaryngol Rep* 5, 167-174.
- 772 15. Cha, Y.H. (2012). Less common neuro-otologic disorders. *Continuum (Minneapolis)* 18, 1142-1157.
- 773 16. Szmulewicz, D.J., Merchant, S.N., and Halmagyi, G.M. (2011). Cerebellar ataxia with neuropathy and  
774 bilateral vestibular areflexia syndrome: a histopathologic case report. *Otol Neurotol* 32, e63-65.

- 775 17. Szmulewicz, D.J., McLean, C.A., Rodriguez, M.L., Chancellor, A.M., Mossman, S., Lamont, D., Roberts,  
776 L., Storey, E., and Halmagyi, G.M. (2014). Dorsal root ganglionopathy is responsible for the sensory  
777 impairment in CANVAS. *Neurology* 82, 1410-1415.
- 778 18. Szmulewicz, D.J., Seiderer, L., Halmagyi, G.M., Storey, E., and Roberts, L. (2015). Neurophysiological  
779 evidence for generalized sensory neuronopathy in cerebellar ataxia with neuropathy and bilateral  
780 vestibular areflexia syndrome. *Muscle Nerve* 51, 600-603.
- 781 19. Szmulewicz, D.J., Waterston, J.A., MacDougall, H.G., Mossman, S., Chancellor, A.M., McLean, C.A.,  
782 Merchant, S., Patrikios, P., Halmagyi, G.M., and Storey, E. (2011). Cerebellar ataxia, neuropathy,  
783 vestibular areflexia syndrome (CANVAS): a review of the clinical features and video-oculographic  
784 diagnosis. *Ann N Y Acad Sci* 1233, 139-147.
- 785 20. Petersen, J.A., Wichmann, W.W., and Weber, K.P. (2013). The pivotal sign of CANVAS. *Neurology* 81,  
786 1642-1643.
- 787 21. Szmulewicz, D., MacDougall, H., Storey, E., Curthoys, I., and Halmagyi, M. (2014). A Novel Quantitative  
788 Bedside Test of Balance Function: The Video Visually Enhanced Vestibulo-ocular Reflex (VVOR)  
789 *Neurology* 82, S19.002.
- 790 22. Campuzano, V., Montermini, L., Molto, M.D., Pianese, L., Cossee, M., Cavalcanti, F., Monros, E., Rodius,  
791 F., Duclos, F., Monticelli, A., et al. (1996). Friedreich's ataxia: autosomal recessive disease caused by  
792 an intronic GAA triplet repeat expansion. *Science* 271, 1423-1427.
- 793 23. Taki, M., Nakamura, T., Matsuura, H., Hasegawa, T., Sakaguchi, H., Morita, K., Ishii, R., Mizuta, I., Kasai,  
794 T., Mizuno, T., et al. (2018). Cerebellar ataxia with neuropathy and vestibular areflexia syndrome  
795 (CANVAS). *Auris Nasus Larynx* 45, 866-870.
- 796 24. Maruta, K., Aoki, M., and Sonoda, Y. (2019). [Cerebellar ataxia with neuropathy and vestibular areflexia  
797 syndrome (CANVAS): a case report]. *Rinsho Shinkeigaku* 59, 27-32.
- 798 25. Bahlo, M., Bennett, M.F., Degorski, P., Tankard, R.M., Delatycki, M.B., and Lockhart, P.J. (2018). Recent  
799 advances in the detection of repeat expansions with short-read next-generation sequencing. *F1000Res*  
800 7.
- 801 26. Seixas, A.I., Loureiro, J.R., Costa, C., Ordonez-Ugalde, A., Marcelino, H., Oliveira, C.L., Loureiro, J.L.,  
802 Dhingra, A., Brandao, E., Cruz, V.T., et al. (2017). A Pentanucleotide ATTTTC Repeat Insertion in the  
803 Non-coding Region of DAB1, Mapping to SCA37, Causes Spinocerebellar Ataxia. *American journal*  
804 *of human genetics* 101, 87-103.
- 805 27. Ishiura, H., Doi, K., Mitsui, J., Yoshimura, J., Matsukawa, M.K., Fujiyama, A., Toyoshima, Y., Kakita, A.,  
806 Takahashi, H., Suzuki, Y., et al. (2018). Expansions of intronic TTTCA and TTTTA repeats in benign  
807 adult familial myoclonic epilepsy. *Nature genetics* 50, 581-590.
- 808 28. Dolzhenko, E., van Vugt, J., Shaw, R.J., Bekritsky, M.A., van Blitterswijk, M., Narzisi, G., Ajay, S.S.,  
809 Rajan, V., Lajoie, B.R., Johnson, N.H., et al. (2017). Detection of long repeat expansions from PCR-  
810 free whole-genome sequence data. *Genome research* 27, 1895-1903.
- 811 29. Tang, H., Kirkness, E.F., Lippert, C., Biggs, W.H., Fabani, M., Guzman, E., Ramakrishnan, S., Lavrenko,  
812 V., Kakaradov, B., Hou, C., et al. (2017). Profiling of Short-Tandem-Repeat Disease Alleles in 12,632  
813 Human Whole Genomes. *American journal of human genetics* 101, 700-715.

- 814 30. Dashnow, H., Lek, M., Phipson, B., Halman, A., Sadedin, S., Lonsdale, A., Davis, M., Lamont, P., Clayton,  
815 J.S., Laing, N.G., et al. (2018). STRetch: detecting and discovering pathogenic short tandem repeat  
816 expansions. *Genome biology* 19, 121.
- 817 31. Mousavi, N., Shleizer-Burko, S., and Gymrek, M. (2018). Profiling the genome-wide landscape of tandem  
818 repeat expansions. *BioRxiv*, <https://doi.org/10.1101/361162>
- 819 32. Cortese, A., Simone, R., Sullivan, R., Vandrovцова, J., Tariq, H., Yan, Y.W., Humphrey, J., Jaunmuktane,  
820 Z., Sivakumar, P., Polke, J., et al. (2019). Biallelic expansion of an intronic repeat in RFC1 is a  
821 common cause of late-onset ataxia. *Nature genetics* 51, 649-658.
- 822 33. Smith, K.R., Bromhead, C.J., Hildebrand, M.S., Shearer, A.E., Lockhart, P.J., Najmabadi, H., Leventer, R.J.,  
823 McGillivray, G., Amor, D.J., Smith, R.J., et al. (2011). Reducing the exome search space for mendelian  
824 diseases using genetic linkage analysis of exome genotypes. *Genome biology* 12, R85.
- 825 34. Bahlo, M., and Bromhead, C.J. (2009). Generating linkage mapping files from Affymetrix SNP chip data.  
826 *Bioinformatics* 25, 1961-1962.
- 827 35. Abecasis, G.R., Cherny, S.S., Cookson, W.O., and Cardon, L.R. (2002). Merlin--rapid analysis of dense  
828 genetic maps using sparse gene flow trees. *Nature genetics* 30, 97-101.
- 829 36. Quinlan, A.R., and Hall, I.M. (2010). BEDTools: a flexible suite of utilities for comparing genomic features.  
830 *Bioinformatics* 26, 841-842.
- 831 37. Pedersen, B.S., Layer, R.M., and Quinlan, A.R. (2016). Vcfanno: fast, flexible annotation of genetic  
832 variants. *Genome biology* 17, 118.
- 833 38. Wang, K., Li, M., and Hakonarson, H. (2010). ANNOVAR: functional annotation of genetic variants from  
834 high-throughput sequencing data. *Nucleic Acids Res* 38, e164.
- 835 39. Dobin, A., Davis, C.A., Schlesinger, F., Drenkow, J., Zaleski, C., Jha, S., Batut, P., Chaisson, M., and  
836 Gingeras, T.R. (2013). STAR: ultrafast universal RNA-seq aligner. *Bioinformatics* 29, 15-21.
- 837 40. Liao, Y., Smyth, G.K., and Shi, W. (2014). featureCounts: an efficient general purpose program for  
838 assigning sequence reads to genomic features. *Bioinformatics* 30, 923-930.
- 839 41. Ritchie, M.E., Phipson, B., Wu, D., Hu, Y., Law, C.W., Shi, W., and Smyth, G.K. (2015). limma powers  
840 differential expression analyses for RNA-sequencing and microarray studies. *Nucleic Acids Res* 43,  
841 e47.
- 842 42. Gandolfo, L.C., Bahlo, M., and Speed, T.P. (2014). Dating rare mutations from small samples with dense  
843 marker data. *Genetics* 197, 1315-1327.
- 844 43. Szmulewicz, D.J., Roberts, L., McLean, C.A., MacDougall, H.G., Halmagyi, G.M., and Storey, E. (2016).  
845 Proposed diagnostic criteria for cerebellar ataxia with neuropathy and vestibular areflexia syndrome  
846 (CANVAS). *Neurol Clin Pract* 6, 61-68.
- 847 44. Wang, K., Li, M., Hadley, D., Liu, R., Glessner, J., Grant, S.F., Hakonarson, H., and Bucan, M. (2007).  
848 PennCNV: an integrated hidden Markov model designed for high-resolution copy number variation  
849 detection in whole-genome SNP genotyping data. *Genome research* 17, 1665-1674.
- 850 45. Nibbeling, E.A.R., Duarri, A., Verschuuren-Bemelmans, C.C., Fokkens, M.R., Karjalainen, J.M., Smeets,  
851 C., de Boer-Bergsma, J.J., van der Vries, G., Dooijes, D., Bampi, G.B., et al. (2017). Exome  
852 sequencing and network analysis identifies shared mechanisms underlying spinocerebellar ataxia. *Brain*  
853 140, 2860-2878.

- 854 46. Rinne, T., Bronstein, A.M., Rudge, P., Gresty, M.A., and Luxon, L.M. (1998). Bilateral loss of vestibular  
855 function: clinical findings in 53 patients. *J Neurol* 245, 314-321.
- 856 47. Ahmad, H., Requena, T., Frejo, L., Cobo, M., Gallego-Martinez, A., Martin, F., Lopez-Escamez, J.A., and  
857 Bronstein, A.M. (2018). Clinical and Functional Characterization of a Missense ELF2 Variant in a  
858 CANVAS Family. *Front Genet* 9, 85.
- 859 48. Lek, M., Karczewski, K.J., Minikel, E.V., Samocha, K.E., Banks, E., Fennell, T., O'Donnell-Luria, A.H.,  
860 Ware, J.S., Hill, A.J., Cummings, B.B., et al. (2016). Analysis of protein-coding genetic variation in  
861 60,706 humans. *Nature* 536, 285-291.
- 862 49. Zhang, G., Gibbs, E., Kelman, Z., O'Donnell, M., and Hurwitz, J. (1999). Studies on the interactions  
863 between human replication factor C and human proliferating cell nuclear antigen. *Proc Natl Acad Sci U*  
864 *S A* 96, 1869-1874.
- 865 50. Yoon, G., and Caldecott, K.W. (2018). Nonsyndromic cerebellar ataxias associated with disorders of DNA  
866 single-strand break repair. *Handbook of clinical neurology* 155, 105-115.
- 867 51. Savitsky, K., Bar-Shira, A., Gilad, S., Rotman, G., Ziv, Y., Vanagaite, L., Tagle, D.A., Smith, S., Uziel, T.,  
868 Sfez, S., et al. (1995). A single ataxia telangiectasia gene with a product similar to PI-3 kinase. *Science*  
869 268, 1749-1753.
- 870 52. Kraus-Perrotta, C., and Lagalwar, S. (2016). Expansion, mosaicism and interruption: mechanisms of the  
871 CAG repeat mutation in spinocerebellar ataxia type 1. *Cerebellum Ataxias* 3, 20.
- 872 53. Mateo, I., Llorca, J., Volpini, V., Corral, J., Berciano, J., and Combarros, O. (2003). GAA expansion size  
873 and age at onset of Friedreich's ataxia. *Neurology* 61, 274-275.
- 874 54. Bushara, K., Bower, M., Liu, J., McFarland, K.N., Landrian, I., Hutter, D., Teive, H.A., Rasmussen, A.,  
875 Mulligan, C.J., and Ashizawa, T. (2013). Expansion of the Spinocerebellar ataxia type 10 (SCA10)  
876 repeat in a patient with Sioux Native American ancestry. *PloS one* 8, e81342.
- 877 55. Sato, N., Amino, T., Kobayashi, K., Asakawa, S., Ishiguro, T., Tsunemi, T., Takahashi, M., Matsuura, T.,  
878 Flanigan, K.M., Iwasaki, S., et al. (2009). Spinocerebellar ataxia type 31 is associated with "inserted"  
879 penta-nucleotide repeats containing (TGGA)n. *American journal of human genetics* 85, 544-557.
- 880 56. Jardim, L.B., Pereira, M.L., Silveira, I., Ferro, A., Sequeiros, J., and Giugliani, R. (2001). Neurologic  
881 findings in Machado-Joseph disease: relation with disease duration, subtypes, and (CAG)n. *Arch*  
882 *Neurol* 58, 899-904.
- 883 57. Gordon, C.R., Zivotofsky, A.Z., and Caspi, A. (2014). Impaired vestibulo-ocular reflex (VOR) in  
884 spinocerebellar ataxia type 3 (SCA3): bedside and search coil evaluation. *J Vestib Res* 24, 351-355.
- 885 58. Gagnon, C., Desrosiers, J., and Mathieu, J. (2004). Autosomal recessive spastic ataxia of Charlevoix-  
886 Saguenay: upper extremity aptitudes, functional independence and social participation. *Int J Rehabil*  
887 *Res* 27, 253-256.
- 888 59. Vill, K., Muller-Felber, W., Glaser, D., Kuhn, M., Teusch, V., Schreiber, H., Weis, J., Klepper, J.,  
889 Schirmacher, A., Blaschek, A., et al. (2018). SACS variants are a relevant cause of autosomal recessive  
890 hereditary motor and sensory neuropathy. *Human genetics* 137, 911-919.
- 891 60. Richards, S., Aziz, N., Bale, S., Bick, D., Das, S., Gastier-Foster, J., Grody, W.W., Hegde, M., Lyon, E.,  
892 Spector, E., et al. (2015). Standards and guidelines for the interpretation of sequence variants: a joint

- 893 consensus recommendation of the American College of Medical Genetics and Genomics and the  
894 Association for Molecular Pathology. *Genet Med* 17, 405-424.
- 895 61. Sullivan, R., Yau, W.Y., O'Connor, E., and Houlden, H. (2019). Spinocerebellar ataxia: an update. *J Neurol*  
896 266, 533-544.
- 897 62. Galatolo, D., Tessa, A., Filla, A., and Santorelli, F.M. (2018). Clinical application of next generation  
898 sequencing in hereditary spinocerebellar ataxia: increasing the diagnostic yield and broadening the  
899 ataxia-spasticity spectrum. A retrospective analysis. *Neurogenetics* 19, 1-8.
- 900



# CANVAS study overview

## Cohort collection

22 families with CANVAS:  
11 sporadic cases  
7 affected sibling pairs  
4 multigeneration affected families

## Linkage analysis

SNP chip: 4 families (CANVAS1,2,3,4)  
WES: 1 family (CANVAS9)

Identify **homozygous** single overlapping linkage region:  
**chr4:38941465-40390306**

## Whole exome sequencing (WES) - large collaboration with CIDR

23 affected individuals from 15 families  
**No shared rare or de novo variants detected**

## Whole genome sequencing (WGS)

Two unrelated individuals with CANVAS  
No shared rare or de novo variants detected

**Identify novel RE expansion: homozygous inheritance of rare AAGGG intronic RE (chr4:39350045) in the gene *RFC1* - within the chr4 linkage region.**

## Validation by repeat primed PCR

**Confirm homozygous AAGGG inheritance in 18 of 22 CANVAS families**  
4 families negative for AAGGG RE - prioritised for further WGS

## Re-analysis of WES (CANVAS9 and CIDR)

Off target reads in WES protocol  
Single read coverage at chr4:39350045 in 14 individuals

## AAGGG expansion detected in 11 patients, from 9 different families

3 patients (2 families) contain evidence for the reference genome  
2 patients (2 families) contain evidence for both AAGGG and AAAGG

## WGS round 2

WGS: 5 patients negative for AAGGG in *RFC1*  
- genomic re-diagnosis:  
- SCA3, SACS (compound heterozygous),  
- SCA45 (point mutation in *FAT2*)  
- VOUS: point mutation in *ATXN7*

WGS: 2 patients with potential AAAGG/AAGGG RE  
- CANVAS2-2: confirm AAGGG RE on both alleles  
- **CANVAS8-8: confirm AAGGG on one allele, and AAAGG on second allele**

# A CANVAS9

bioRxiv preprint doi: <https://doi.org/10.1101/597781>; this version posted April 19, 2019. The copyright holder for this preprint (which was not certified by peer review) is the author/funder, who has granted bioRxiv a license to display the preprint in perpetuity. It is made available under aCC-BY-NC-ND 4.0 International license.

II

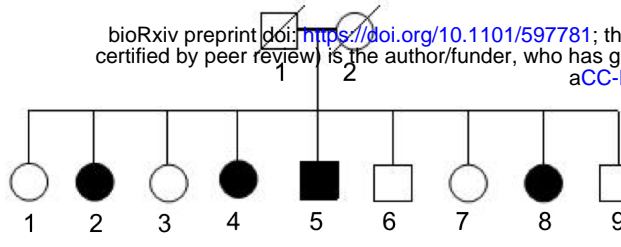

# B genome parametric LOD score for CANVAS9

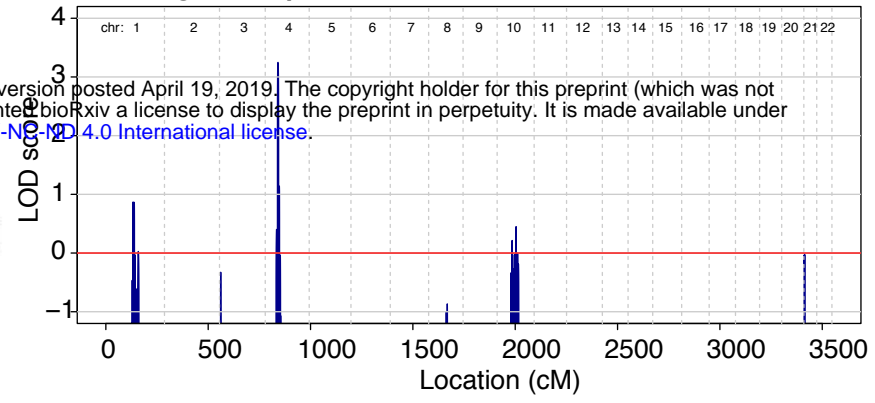

# C

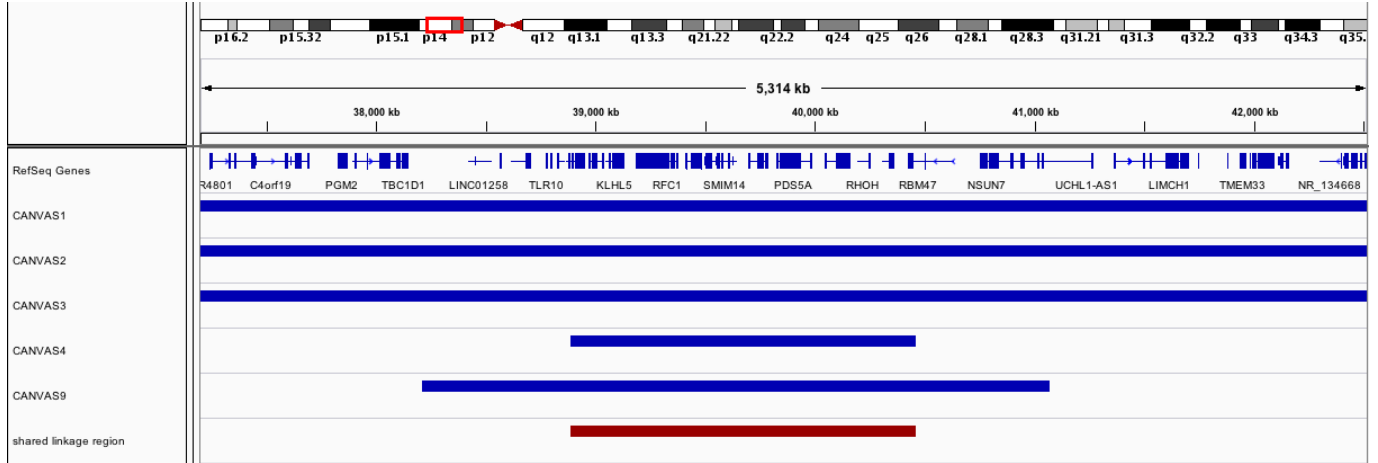

# D

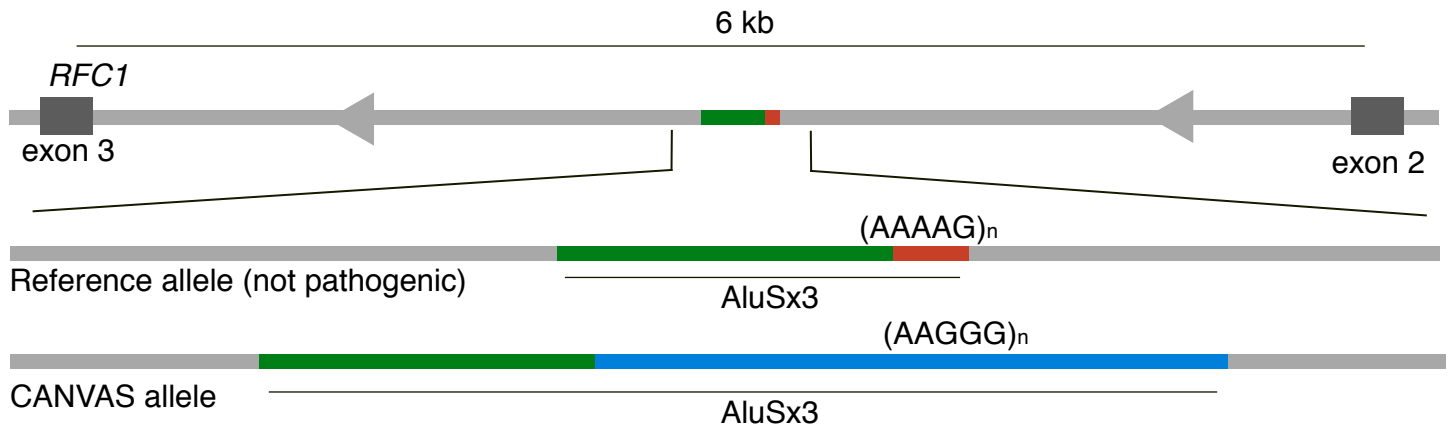

# PCR-based WGS

# PCR-free WGS

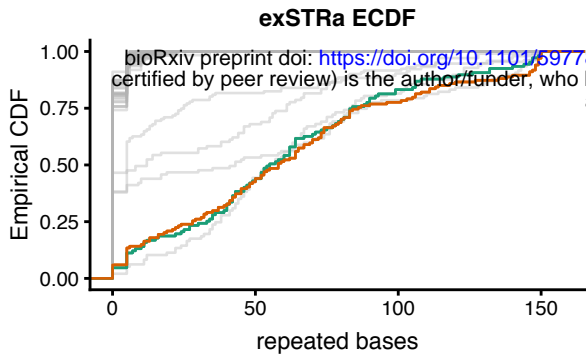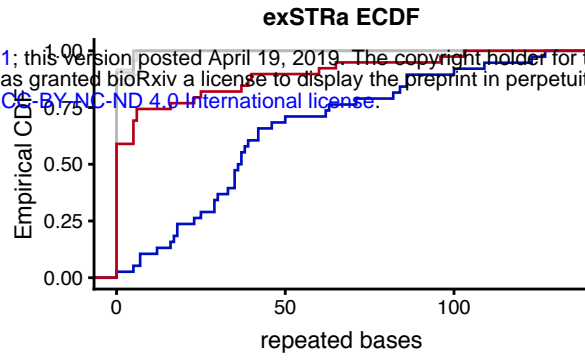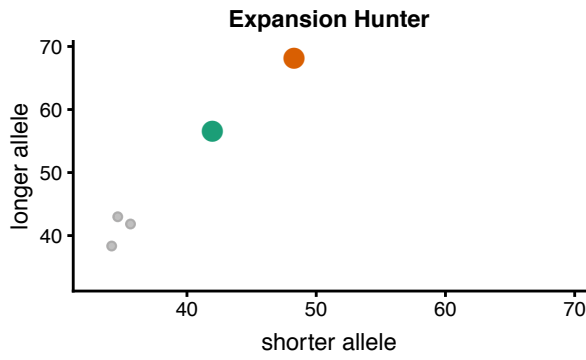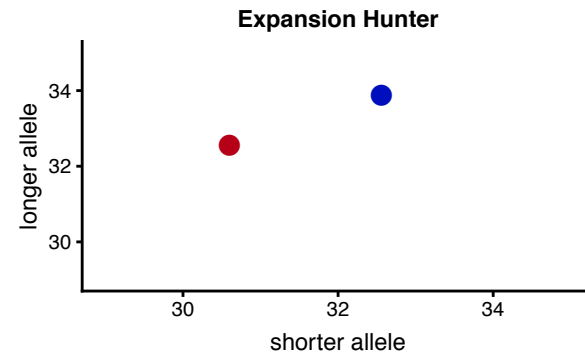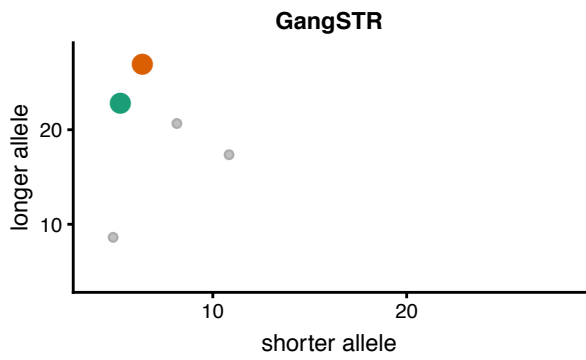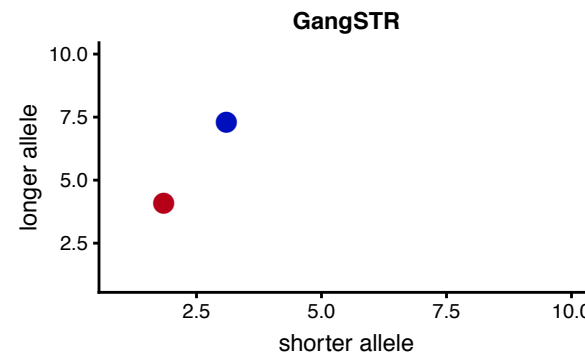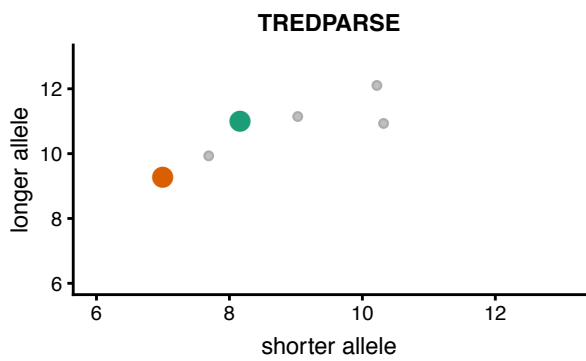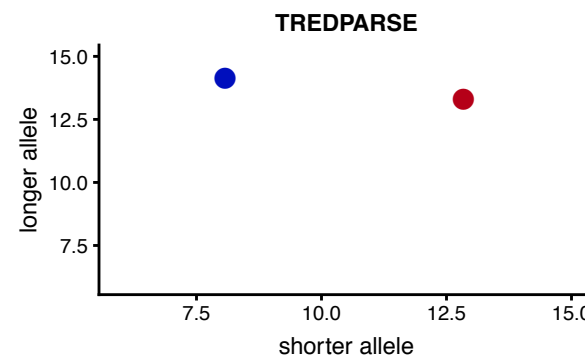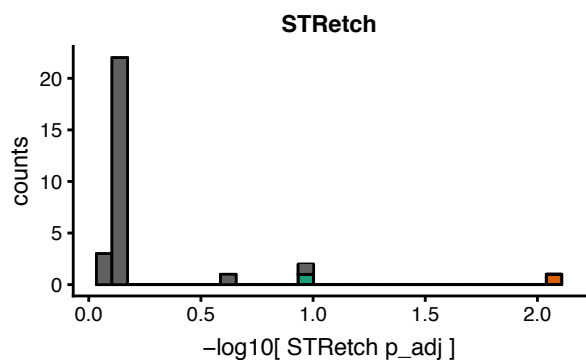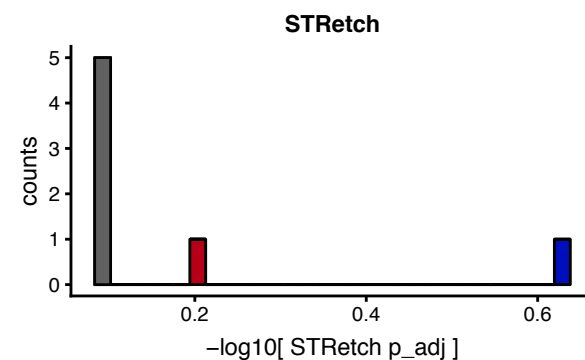

- CANVAS9
- CANVAS1
- non-CANVAS

- CANVAS2
- CANVAS8
- non-CANVAS

bioRxiv preprint doi: <https://doi.org/10.1101/597781>; this version posted April 19, 2019. The copyright holder for this preprint (which was not certified by peer review) is the author/funder, who has granted bioRxiv a license to display the preprint in perpetuity. It is made available under aCC-BY-NC-ND 4.0 International license.

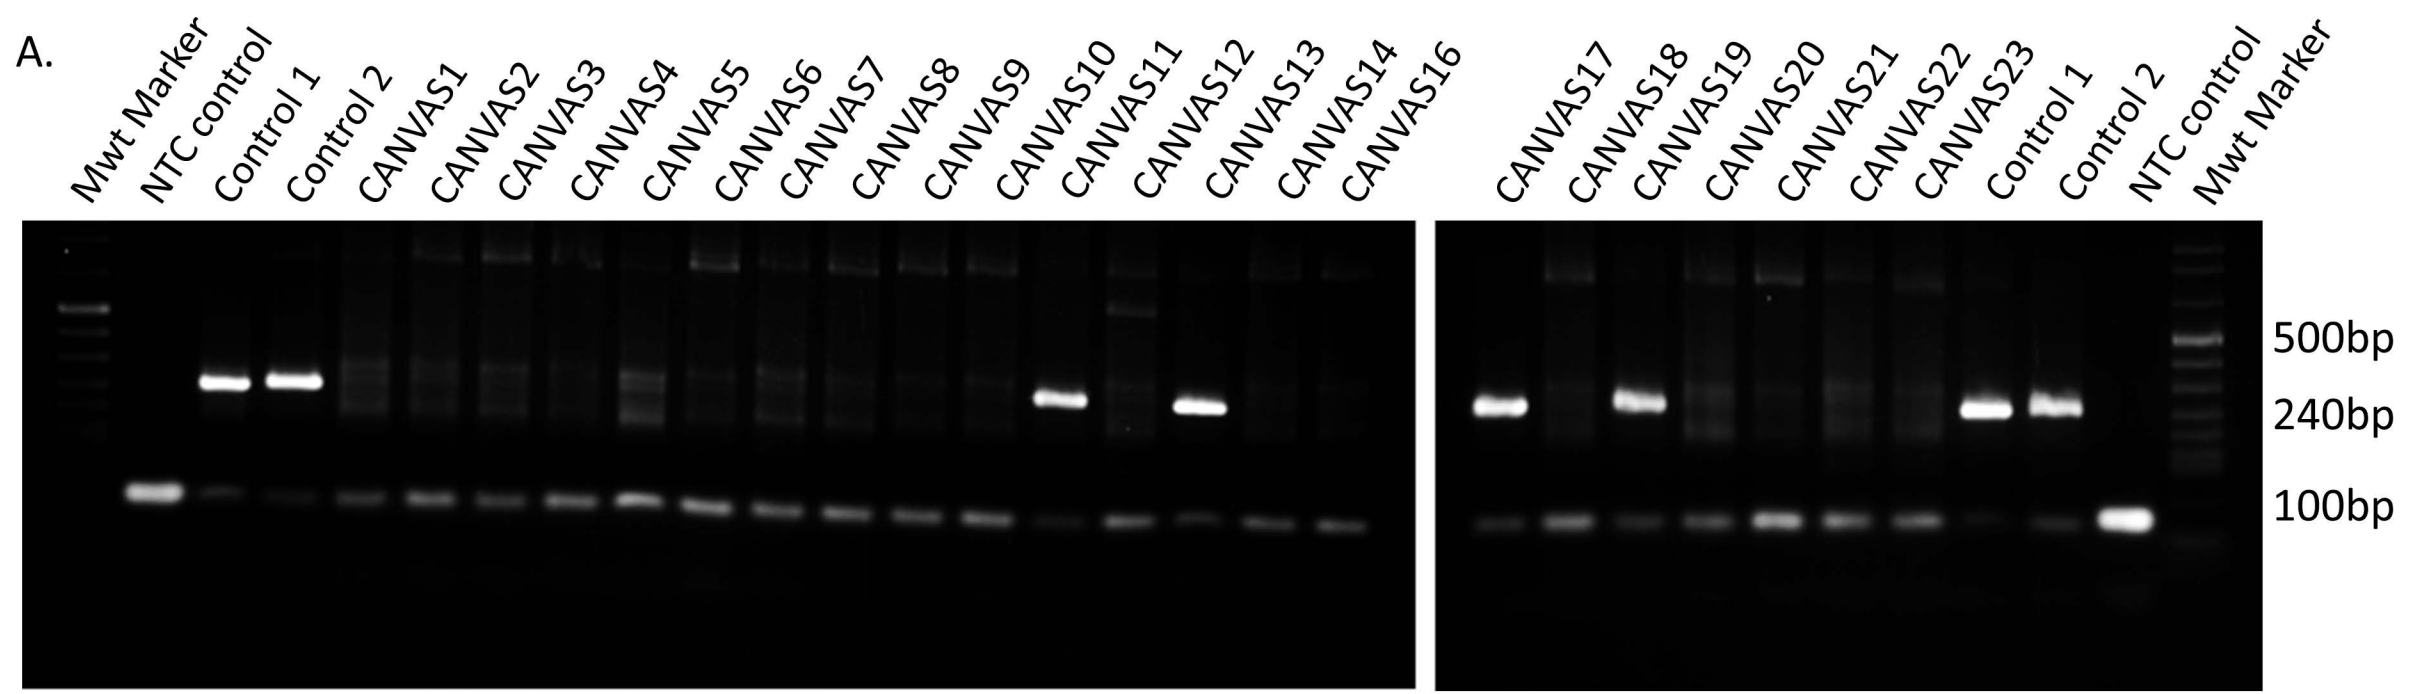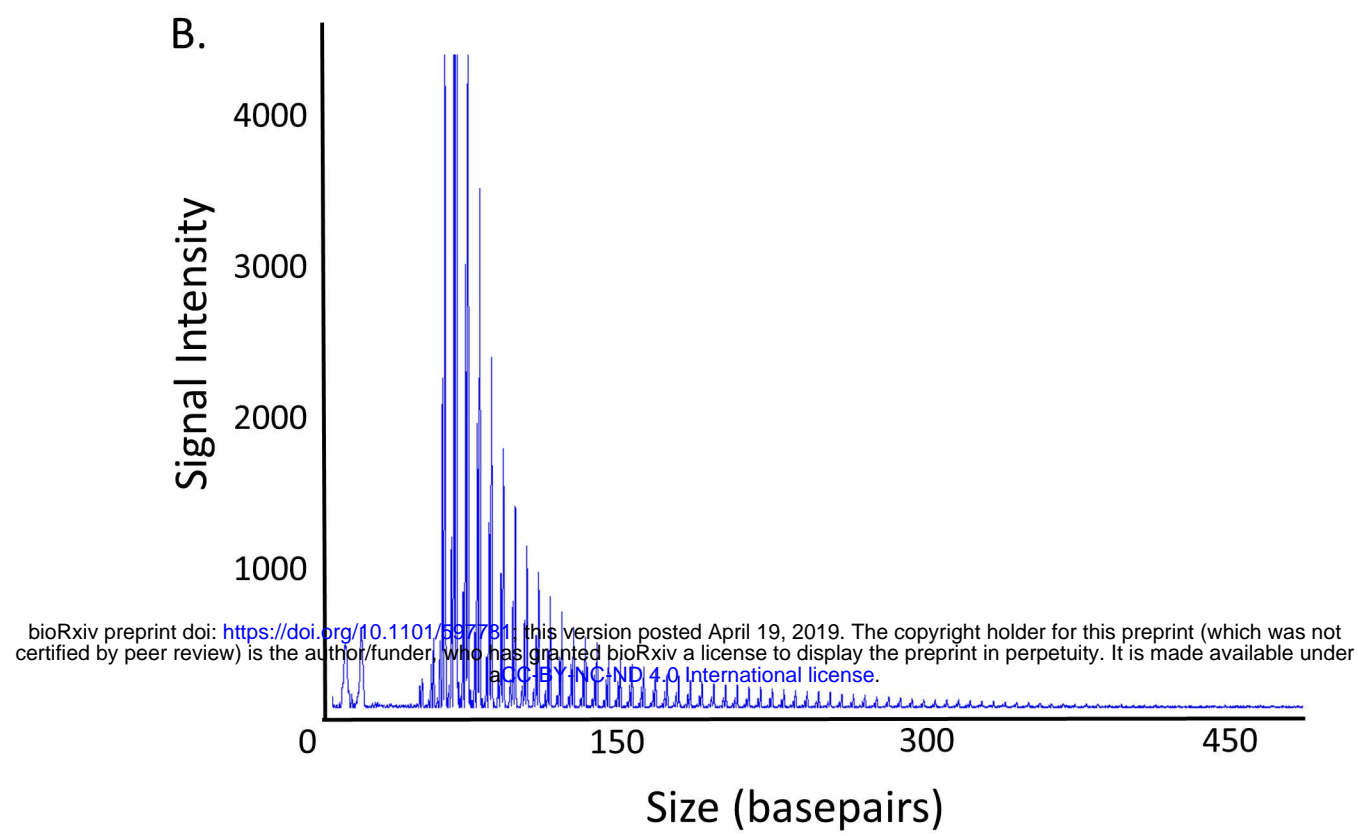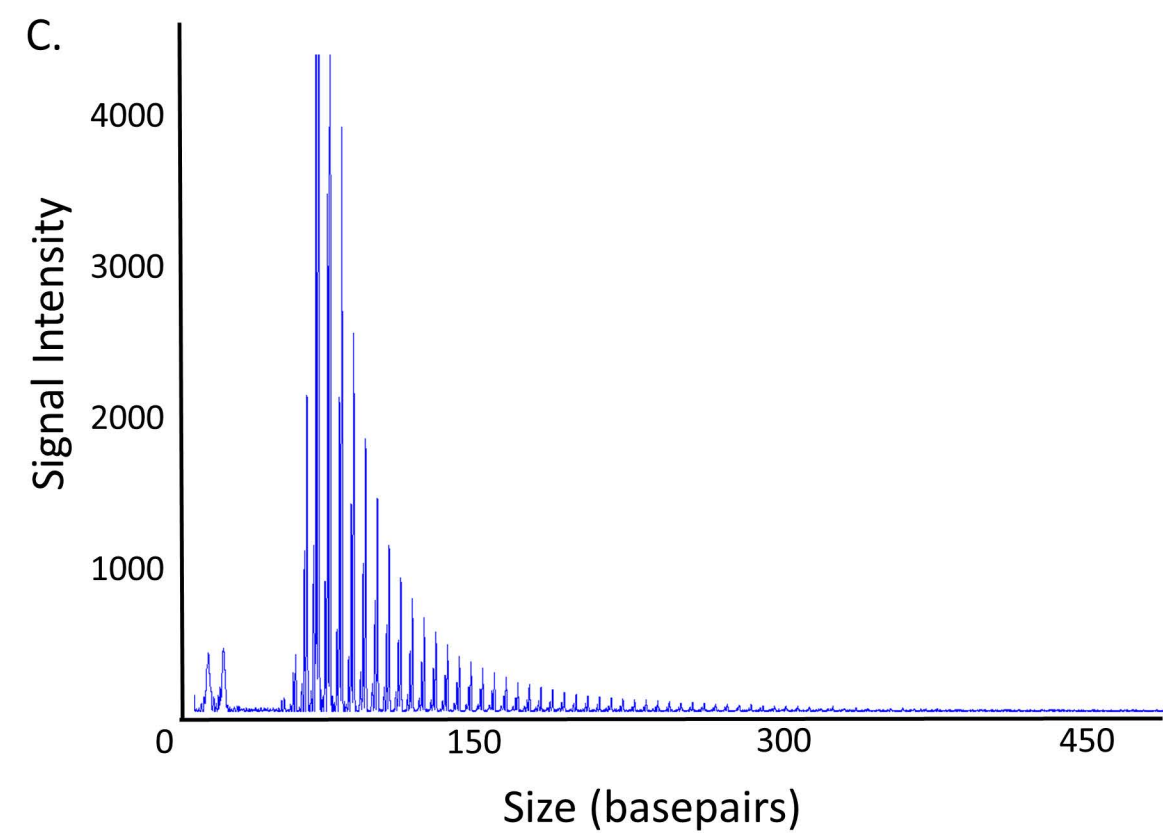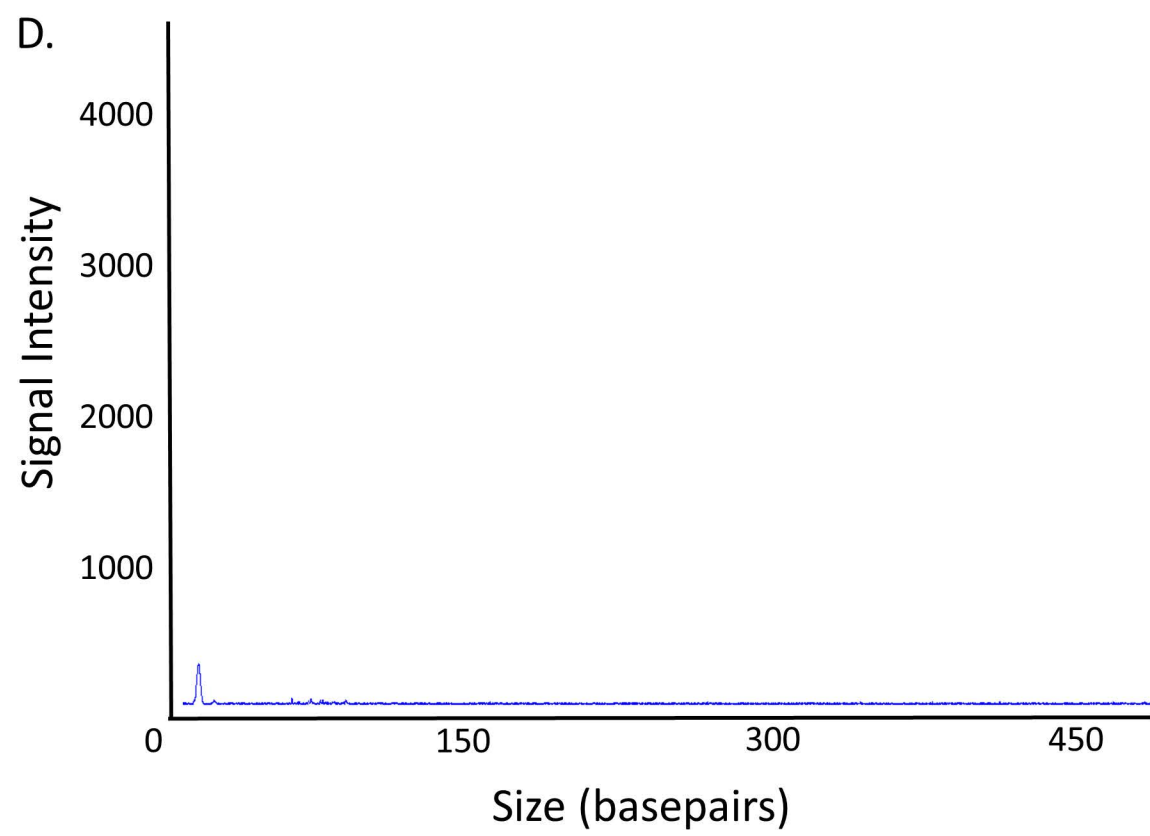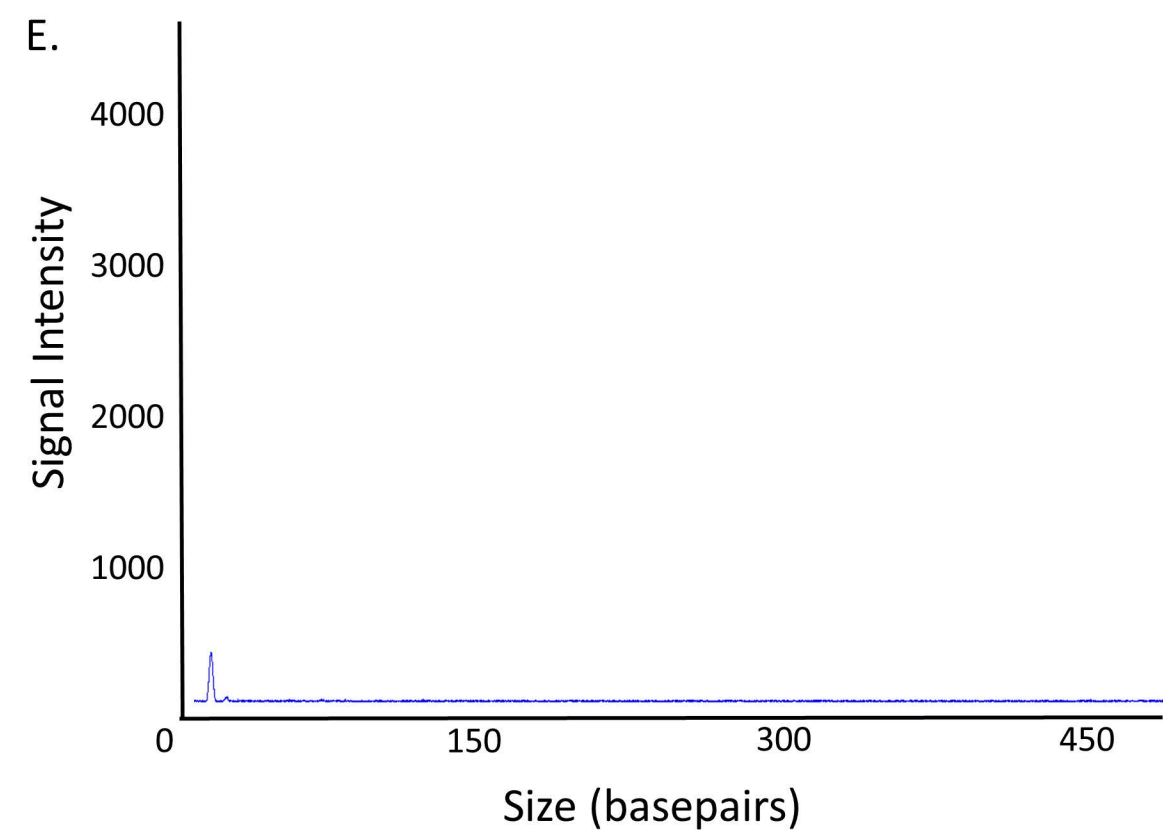

A

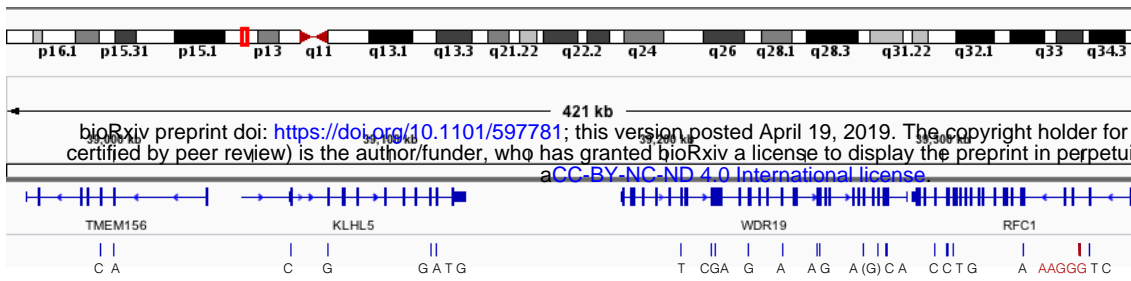

B

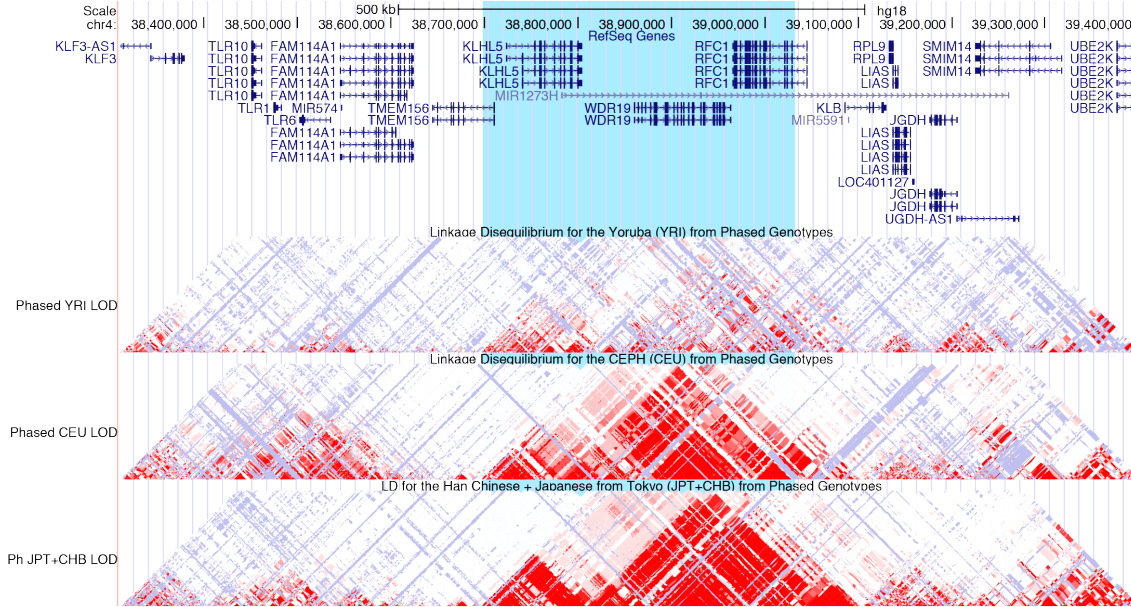

C

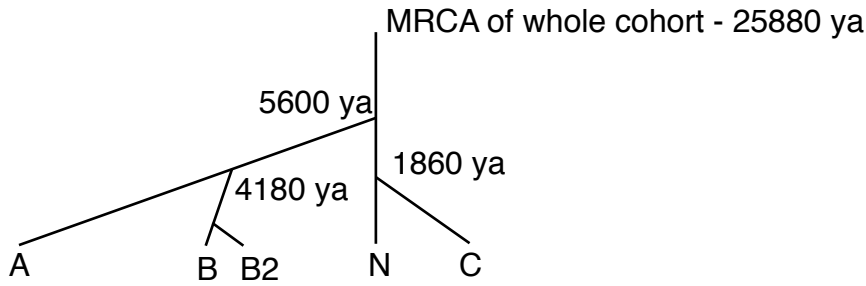

Source: https://www.biorxiv.org/content/biorxiv/early/2019/04/19/597781.full.pdf
